# Supplementary material
Source: publisher figshare collection journal article supplement (https://springernature.figshare.com/ndownloader/files/17535731)
Supplement: Supplementary file 1 [file 17535731]

#fam_id	total	PANDA	LEOPARD	TIGER	DOG	CAT	LION	HYENA	HUMAN	spec_num
OG2_1000	546	38	65	65	67	69	67	52	123	8
OG2_1001	419	0	0	0	0	0	0	419	0	1
OG2_1002	405	0	0	0	6	1	1	397	0	4
OG2_1003	229	20	28	25	31	26	21	7	71	8
OG2_1004	225	28	25	23	15	22	47	6	59	8
OG2_1005	211	0	0	0	1	0	0	210	0	2
OG2_1006	148	18	19	19	18	18	19	18	19	8
OG2_1007	133	23	16	14	18	15	10	19	18	8
OG2_1008	125	16	16	17	16	17	14	12	17	8
OG2_1009	115	17	15	13	15	14	11	15	15	8
OG2_1010	113	14	12	14	14	14	14	15	16	8
OG2_1011	107	14	13	14	14	14	11	13	14	8
OG2_1012	106	14	18	16	14	17	9	0	18	7
OG2_1013	101	14	12	12	12	14	10	14	13	8
OG2_1014	101	11	13	12	13	13	11	14	14	8
OG2_1015	99	29	17	10	11	18	1	11	2	8
OG2_1016	98	12	12	12	12	12	13	13	12	8
OG2_1017	95	12	12	11	12	12	10	14	12	8
OG2_1018	95	12	12	12	12	12	11	12	12	8
OG2_1019	95	12	12	12	11	12	11	13	12	8
OG2_1020	89	11	11	11	11	11	12	11	11	8
OG2_1021	88	13	8	6	12	9	29	7	4	8
OG2_1022	88	12	6	5	45	3	10	5	2	8
OG2_1023	87	10	11	9	10	10	13	12	12	8
OG2_1024	86	11	10	8	13	11	11	11	11	8
OG2_1025	83	11	11	10	11	9	10	12	9	8
OG2_1026	82	8	13	8	10	10	13	10	10	8
OG2_1027	80	10	9	7	10	10	11	12	11	8
OG2_1028	80	10	10	10	10	10	10	10	10	8
OG2_1029	79	10	10	10	10	10	9	10	10	8
OG2_1030	79	10	10	10	10	10	10	9	10	8
OG2_1031	78	10	10	10	10	10	10	8	10	8
OG2_1032	77	8	8	7	8	8	8	7	23	8
OG2_1033	75	9	9	9	9	11	8	9	11	8
OG2_1034	75	9	14	4	10	11	2	11	14	8
OG2_1035	74	9	9	9	9	9	9	11	9	8
OG2_1036	73	10	9	7	10	11	4	8	14	8
OG2_1037	73	8	9	10	8	9	10	10	9	8
OG2_1038	73	7	7	9	10	12	6	2	20	8
OG2_1039	70	9	9	8	8	10	8	9	9	8
OG2_1040	70	5	5	6	7	5	7	4	31	8
OG2_1041	69	8	7	9	10	7	8	9	11	8
OG2_1042	69	9	9	9	9	9	6	9	9	8
OG2_1043	69	8	9	8	9	9	9	8	9	8
OG2_1044	67	9	9	8	9	9	7	7	9	8
OG2_1045	67	0	0	0	0	0	0	67	0	1
OG2_1046	66	8	8	8	9	7	8	10	8	8
OG2_1047	65	8	8	9	8	8	8	8	8	8
OG2_1048	65	9	8	8	10	7	8	7	8	8
OG2_1049	65	8	8	7	9	9	7	6	11	8
OG2_1050	63	14	6	5	10	6	5	10	7	8
OG2_1051	63	8	8	7	8	8	8	8	8	8
OG2_1052	62	0	0	0	0	0	0	62	0	1
OG2_1053	61	6	8	8	7	6	9	7	10	8
OG2_1054	60	6	8	8	8	8	6	8	8	8
OG2_1055	60	2	9	3	9	6	18	8	5	8
OG2_1056	59	7	7	7	7	7	8	9	7	8
OG2_1057	59	6	7	5	8	7	10	8	8	8
OG2_1058	58	7	8	7	7	7	6	8	8	8
OG2_1059	58	7	7	7	7	7	7	8	8	8
OG2_1060	58	6	8	8	6	8	7	7	8	8
OG2_1061	57	7	8	8	8	8	6	6	6	8
OG2_1062	57	7	7	8	7	7	7	7	7	8
OG2_1063	57	8	8	7	8	7	4	8	7	8
OG2_1064	57	7	7	7	7	7	7	8	7	8
OG2_1065	56	7	7	7	7	7	7	7	7	8
OG2_1066	56	7	7	7	7	7	6	8	7	8
OG2_1067	55	7	7	6	7	7	7	7	7	8
OG2_1068	54	8	7	6	7	7	6	6	7	8
OG2_1069	54	7	7	6	8	7	7	5	7	8
OG2_1070	54	6	7	5	7	6	17	3	3	8
OG2_1071	52	7	7	7	7	7	5	5	7	8
OG2_1072	51	7	6	7	6	6	6	7	6	8
OG2_1073	51	7	7	6	5	7	7	3	9	8
OG2_1074	51	7	6	6	6	7	6	7	6	8
OG2_1075	51	5	7	5	6	6	5	9	8	8
OG2_1076	51	6	7	5	6	4	8	9	6	8
OG2_1077	50	5	3	4	10	4	10	7	7	8
OG2_1078	49	7	8	7	7	7	5	2	6	8
OG2_1079	49	7	7	5	7	7	5	4	7	8
OG2_1080	49	7	8	7	6	9	5	0	7	7
OG2_1081	49	6	7	7	5	7	5	6	6	8
OG2_1082	48	6	6	6	6	6	5	7	6	8
OG2_1083	48	6	6	6	6	6	6	5	7	8
OG2_1084	48	6	6	6	6	6	6	5	7	8
OG2_1085	48	5	6	6	6	6	7	6	6	8
OG2_1086	48	6	6	6	6	6	6	6	6	8
OG2_1087	48	6	6	6	6	6	7	5	6	8
OG2_1088	48	6	6	6	6	6	6	6	6	8
OG2_1089	48	6	6	6	6	6	6	6	6	8
OG2_1090	48	6	6	6	6	6	6	6	6	8
OG2_1091	48	10	8	0	3	7	1	9	10	7
OG2_1092	47	6	6	6	6	6	5	6	6	8
OG2_1093	47	7	6	5	6	5	5	8	5	8
OG2_1094	47	7	5	5	6	5	5	7	7	8
OG2_1095	47	6	6	6	6	6	5	6	6	8
OG2_1096	47	5	6	6	6	6	6	6	6	8
OG2_1097	47	9	4	6	6	5	5	7	5	8
OG2_1098	46	6	6	6	6	6	6	4	6	8
OG2_1099	46	6	6	6	5	6	6	6	5	8
OG2_1100	45	8	7	7	6	6	1	6	4	8
OG2_1101	45	8	5	5	5	5	4	8	5	8
OG2_1102	45	6	6	4	6	6	5	6	6	8
OG2_1103	45	6	6	6	5	5	6	5	6	8
OG2_1104	44	6	5	5	5	5	5	7	6	8
OG2_1105	44	6	6	6	5	6	4	5	6	8
OG2_1106	44	5	6	6	9	7	4	6	1	8
OG2_1107	44	5	5	6	6	5	5	6	6	8
OG2_1108	43	5	6	6	5	6	5	5	5	8
OG2_1109	43	5	5	5	6	5	7	5	5	8
OG2_1110	43	5	5	6	4	5	5	7	6	8
OG2_1111	43	6	5	6	6	5	5	4	6	8
OG2_1112	43	4	7	1	1	6	21	2	1	8
OG2_1113	43	1	1	1	5	2	1	10	22	8
OG2_1114	42	6	6	5	4	5	5	6	5	8
OG2_1115	42	9	7	5	6	3	8	3	1	8
OG2_1116	42	6	5	5	6	5	4	6	5	8
OG2_1117	41	5	5	5	5	5	5	6	5	8
OG2_1118	41	5	5	5	5	5	5	5	6	8
OG2_1119	41	5	5	5	6	5	4	6	5	8
OG2_1120	41	5	5	5	5	5	5	6	5	8
OG2_1121	41	4	7	6	2	6	9	3	4	8
OG2_1122	40	5	5	5	5	5	5	5	5	8
OG2_1123	40	5	5	6	5	5	4	5	5	8
OG2_1124	40	5	5	5	4	5	5	5	6	8
OG2_1125	40	5	5	5	5	5	5	5	5	8
OG2_1126	40	5	5	5	5	5	5	5	5	8
OG2_1127	40	5	5	5	5	5	5	4	6	8
OG2_1128	40	5	6	5	5	6	3	5	5	8
OG2_1129	40	5	5	5	4	5	6	6	4	8
OG2_1130	40	6	6	6	4	5	3	5	5	8
OG2_1131	40	5	5	5	5	5	5	5	5	8
OG2_1132	40	5	5	5	5	5	3	5	7	8
OG2_1133	40	5	5	5	5	5	5	5	5	8
OG2_1134	40	5	5	4	5	5	5	5	6	8
OG2_1135	40	5	5	5	5	5	5	5	5	8
OG2_1136	40	5	5	5	5	5	4	5	6	8
OG2_1137	40	5	5	5	5	5	4	6	5	8
OG2_1138	40	0	0	0	0	0	0	40	0	1
OG2_1139	39	5	5	5	5	5	4	5	5	8
OG2_1140	39	5	5	4	5	5	5	5	5	8
OG2_1141	39	5	5	5	5	5	4	5	5	8
OG2_1142	39	5	5	4	5	5	5	5	5	8
OG2_1143	39	5	5	5	5	5	4	5	5	8
OG2_1144	39	6	4	5	5	5	4	5	5	8
OG2_1145	39	5	5	5	5	5	4	5	5	8
OG2_1146	39	5	5	4	5	5	5	5	5	8
OG2_1147	39	5	5	5	5	5	5	4	5	8
OG2_1148	39	5	5	5	5	5	5	4	5	8
OG2_1149	39	7	4	4	9	4	3	4	4	8
OG2_1150	39	8	5	5	7	5	4	2	3	8
OG2_1151	39	5	5	5	5	5	5	4	5	8
OG2_1152	39	5	5	5	5	5	4	5	5	8
OG2_1153	39	5	5	5	5	5	3	6	5	8
OG2_1154	39	4	4	3	21	1	2	2	2	8
OG2_1155	39	1	1	1	7	1	3	0	25	7
OG2_1156	39	5	5	5	5	5	5	4	5	8
OG2_1157	39	5	5	5	5	5	5	4	5	8
OG2_1158	38	4	4	4	4	5	8	5	4	8
OG2_1159	38	5	5	4	5	5	4	5	5	8
OG2_1160	38	5	5	4	5	5	5	5	4	8
OG2_1161	38	5	5	4	5	5	4	5	5	8
OG2_1162	38	5	5	4	5	5	4	5	5	8
OG2_1163	38	5	5	5	5	5	5	3	5	8
OG2_1164	38	6	4	4	5	5	3	6	5	8
OG2_1165	38	6	5	3	5	5	3	6	5	8
OG2_1166	38	5	5	5	5	5	5	4	4	8
OG2_1167	38	6	5	5	5	5	3	4	5	8
OG2_1168	38	5	5	4	6	5	3	5	5	8
OG2_1169	38	6	5	3	5	5	4	5	5	8
OG2_1170	38	5	5	4	5	5	3	6	5	8
OG2_1171	37	5	5	5	6	5	2	4	5	8
OG2_1172	37	5	5	4	5	5	4	4	5	8
OG2_1173	37	5	5	4	5	5	4	5	4	8
OG2_1174	37	4	3	4	7	4	5	6	4	8
OG2_1175	37	5	4	4	4	4	4	6	6	8
OG2_1176	37	4	4	4	5	4	5	5	6	8
OG2_1177	37	4	4	2	11	5	3	4	4	8
OG2_1178	37	6	4	4	6	4	3	5	5	8
OG2_1179	37	5	5	2	6	5	3	6	5	8
OG2_1180	37	5	5	4	5	5	4	5	4	8
OG2_1181	37	5	5	4	5	5	4	5	4	8
OG2_1182	37	5	5	5	5	5	3	4	5	8
OG2_1183	37	3	4	4	10	5	2	7	2	8
OG2_1184	37	4	5	5	4	6	4	6	3	8
OG2_1185	37	5	4	3	5	5	4	6	5	8
OG2_1186	36	3	6	6	4	6	5	4	2	8
OG2_1187	36	5	5	4	5	5	2	5	5	8
OG2_1188	36	5	5	5	5	5	3	3	5	8
OG2_1189	36	6	4	5	4	4	4	5	4	8
OG2_1190	35	5	4	4	4	5	3	5	5	8
OG2_1191	34	4	4	4	4	4	5	5	4	8
OG2_1192	34	4	4	4	4	4	4	5	5	8
OG2_1193	34	2	5	4	6	6	3	3	5	8
OG2_1194	34	5	5	2	4	5	3	4	6	8
OG2_1195	34	5	5	3	4	5	3	3	6	8
OG2_1196	34	5	5	3	4	4	5	3	5	8
OG2_1197	34	4	4	5	4	4	3	6	4	8
OG2_1198	34	5	5	5	5	2	4	5	3	8
OG2_1199	34	4	8	8	2	8	0	3	1	7
OG2_1200	34	5	5	3	5	2	5	4	5	8
OG2_1201	34	4	4	4	5	4	4	5	4	8
OG2_1202	33	3	5	5	5	5	3	3	4	8
OG2_1203	33	5	5	3	4	6	5	1	4	8
OG2_1204	33	5	4	4	4	4	4	4	4	8
OG2_1205	33	4	4	4	6	4	2	4	5	8
OG2_1206	33	4	4	5	4	4	4	4	4	8
OG2_1207	33	4	4	4	5	4	4	4	4	8
OG2_1208	33	4	4	3	4	4	3	5	6	8
OG2_1209	33	4	4	4	4	4	4	5	4	8
OG2_1210	33	3	4	4	3	4	5	3	7	8
OG2_1211	33	4	4	4	4	4	4	5	4	8
OG2_1212	33	5	5	5	3	5	3	2	5	8
OG2_1213	33	7	4	4	3	4	3	5	3	8
OG2_1214	33	4	4	4	3	4	6	4	4	8
OG2_1215	33	3	5	5	5	5	1	4	5	8
OG2_1216	33	4	4	4	4	4	4	4	5	8
OG2_1217	33	5	4	4	4	4	4	4	4	8
OG2_1218	33	4	4	4	4	4	4	4	5	8
OG2_1219	33	3	2	2	15	5	3	0	3	7
OG2_1220	33	4	4	4	4	4	4	5	4	8
OG2_1221	33	4	4	4	4	4	5	4	4	8
OG2_1222	32	4	4	4	5	4	4	3	4	8
OG2_1223	32	4	4	4	4	4	4	4	4	8
OG2_1224	32	4	4	4	4	4	5	3	4	8
OG2_1225	32	4	4	4	4	4	4	4	4	8
OG2_1226	32	4	4	4	4	4	4	4	4	8
OG2_1227	32	4	4	4	4	4	3	5	4	8
OG2_1228	32	4	4	4	4	4	4	4	4	8
OG2_1229	32	4	4	4	4	4	3	4	5	8
OG2_1230	32	5	4	4	4	4	4	4	3	8
OG2_1231	32	4	5	4	4	4	3	4	4	8
OG2_1232	32	4	4	4	4	4	4	4	4	8
OG2_1233	32	5	3	4	5	4	4	3	4	8
OG2_1234	32	4	4	4	4	4	3	5	4	8
OG2_1235	32	4	4	4	4	4	4	4	4	8
OG2_1236	32	4	4	4	5	4	3	4	4	8
OG2_1237	32	5	4	4	4	4	3	3	5	8
OG2_1238	32	4	4	4	4	4	4	4	4	8
OG2_1239	32	4	4	4	4	4	4	4	4	8
OG2_1240	32	4	4	4	4	4	4	4	4	8
OG2_1241	32	4	4	4	4	4	4	4	4	8
OG2_1242	32	4	4	4	4	4	4	4	4	8
OG2_1243	32	4	4	4	4	4	4	4	4	8
OG2_1244	32	4	4	4	4	4	4	4	4	8
OG2_1245	32	4	4	4	4	4	4	4	4	8
OG2_1246	32	4	4	4	4	4	3	5	4	8
OG2_1247	32	4	4	5	3	4	4	4	4	8
OG2_1248	32	4	4	4	4	4	3	5	4	8
OG2_1249	32	4	4	4	4	4	4	4	4	8
OG2_1250	32	4	4	4	4	4	4	4	4	8
OG2_1251	32	4	4	4	4	4	4	3	5	8
OG2_1252	32	4	3	5	4	4	4	4	4	8
OG2_1253	32	5	4	2	5	4	3	5	4	8
OG2_1254	32	4	4	4	4	4	4	4	4	8
OG2_1255	32	4	4	4	4	4	4	4	4	8
OG2_1256	32	4	6	4	3	6	2	6	1	8
OG2_1257	32	4	4	4	4	4	4	4	4	8
OG2_1258	32	4	4	4	4	4	4	4	4	8
OG2_1259	32	4	4	4	4	4	4	4	4	8
OG2_1260	32	4	4	3	5	5	3	4	4	8
OG2_1261	32	4	4	4	4	4	4	4	4	8
OG2_1262	32	4	4	4	4	4	4	4	4	8
OG2_1263	32	4	4	4	4	4	4	4	4	8
OG2_1264	32	4	4	4	4	4	4	4	4	8
OG2_1265	32	4	4	4	4	4	4	4	4	8
OG2_1266	32	4	4	4	4	4	4	4	4	8
OG2_1267	32	4	4	4	4	4	4	4	4	8
OG2_1268	32	4	4	4	4	4	4	4	4	8
OG2_1269	32	6	4	1	6	2	2	7	4	8
OG2_1270	32	5	4	3	4	4	5	3	4	8
OG2_1271	32	0	0	0	0	0	0	32	0	1
OG2_1272	31	4	4	4	4	4	3	4	4	8
OG2_1273	31	4	4	4	4	4	3	4	4	8
OG2_1274	31	4	4	4	4	4	3	4	4	8
OG2_1275	31	4	4	3	4	4	4	4	4	8
OG2_1276	31	4	4	4	4	4	3	4	4	8
OG2_1277	31	4	4	3	4	4	3	4	5	8
OG2_1278	31	4	4	4	4	4	4	3	4	8
OG2_1279	31	4	4	4	4	4	4	3	4	8
OG2_1280	31	4	4	4	4	4	3	4	4	8
OG2_1281	31	4	4	4	3	4	4	4	4	8
OG2_1282	31	4	4	4	4	4	3	4	4	8
OG2_1283	31	4	4	4	4	4	3	4	4	8
OG2_1284	31	4	4	5	4	3	3	4	4	8
OG2_1285	31	4	4	4	4	4	4	3	4	8
OG2_1286	31	4	4	4	4	4	2	5	4	8
OG2_1287	31	3	4	4	4	4	4	4	4	8
OG2_1288	31	4	3	4	4	4	4	4	4	8
OG2_1289	31	4	4	4	4	4	4	3	4	8
OG2_1290	31	4	4	4	4	4	3	4	4	8
OG2_1291	31	4	4	4	4	4	4	3	4	8
OG2_1292	31	4	4	4	3	4	4	4	4	8
OG2_1293	31	3	4	4	3	4	4	4	5	8
OG2_1294	31	4	3	4	4	3	4	5	4	8
OG2_1295	31	4	4	4	4	4	4	3	4	8
OG2_1296	31	4	4	3	5	4	3	4	4	8
OG2_1297	31	4	4	3	4	4	3	5	4	8
OG2_1298	31	2	3	3	6	4	4	4	5	8
OG2_1299	31	4	4	4	3	4	4	4	4	8
OG2_1300	31	4	4	3	4	4	4	4	4	8
OG2_1301	31	4	4	4	4	4	4	3	4	8
OG2_1302	31	4	4	4	4	4	4	3	4	8
OG2_1303	31	4	2	2	7	2	2	2	10	8
OG2_1304	31	4	4	4	4	4	3	4	4	8
OG2_1305	31	4	4	4	4	4	3	4	4	8
OG2_1306	31	4	4	4	4	4	3	4	4	8
OG2_1307	31	4	4	4	4	4	3	4	4	8
OG2_1308	31	4	4	3	4	4	4	4	4	8
OG2_1309	31	4	4	4	4	4	3	4	4	8
OG2_1310	31	4	4	4	4	4	3	4	4	8
OG2_1311	31	4	3	4	4	4	3	5	4	8
OG2_1312	31	4	2	2	4	3	11	3	2	8
OG2_1313	31	5	2	3	5	3	4	5	4	8
OG2_1314	31	0	0	0	0	0	0	31	0	1
OG2_1315	31	0	0	0	0	0	0	31	0	1
OG2_1316	30	4	4	4	4	4	3	3	4	8
OG2_1317	30	4	3	4	4	4	4	4	3	8
OG2_1318	30	4	4	4	4	4	1	5	4	8
OG2_1319	30	2	5	5	4	5	3	1	5	8
OG2_1320	30	3	4	4	4	4	3	4	4	8
OG2_1321	30	4	4	4	4	4	3	3	4	8
OG2_1322	30	4	4	3	4	4	3	4	4	8
OG2_1323	30	4	4	4	3	4	3	4	4	8
OG2_1324	30	4	4	4	4	4	2	4	4	8
OG2_1325	30	4	3	3	4	4	4	4	4	8
OG2_1326	30	4	4	4	4	4	3	3	4	8
OG2_1327	30	4	4	3	4	4	3	4	4	8
OG2_1328	30	4	4	4	4	4	2	4	4	8
OG2_1329	30	4	5	5	0	5	6	2	3	7
OG2_1330	30	4	4	4	4	4	3	3	4	8
OG2_1331	30	4	3	3	4	4	3	5	4	8
OG2_1332	30	4	4	4	4	4	3	3	4	8
OG2_1333	30	4	4	3	4	4	3	4	4	8
OG2_1334	30	4	4	4	4	4	2	4	4	8
OG2_1335	30	4	4	3	4	4	3	4	4	8
OG2_1336	30	4	4	4	4	4	2	4	4	8
OG2_1337	30	4	4	3	4	4	3	4	4	8
OG2_1338	30	4	4	3	4	4	2	5	4	8
OG2_1339	30	4	4	4	4	4	3	3	4	8
OG2_1340	30	4	4	3	4	4	2	5	4	8
OG2_1341	30	4	4	3	4	4	2	5	4	8
OG2_1342	30	5	4	4	5	3	2	4	3	8
OG2_1343	30	5	3	4	4	4	3	4	3	8
OG2_1344	30	4	4	4	4	4	3	3	4	8
OG2_1345	30	4	4	4	4	4	2	4	4	8
OG2_1346	30	4	4	4	4	4	3	3	4	8
OG2_1347	30	4	4	3	4	4	3	4	4	8
OG2_1348	30	5	6	4	3	4	6	1	1	8
OG2_1349	30	4	4	4	4	4	2	4	4	8
OG2_1350	30	3	4	4	4	3	4	4	4	8
OG2_1351	30	4	4	4	4	4	4	2	4	8
OG2_1352	30	4	4	4	4	4	4	2	4	8
OG2_1353	30	4	4	4	4	4	4	2	4	8
OG2_1354	30	4	4	3	4	4	3	4	4	8
OG2_1355	30	4	4	4	3	4	3	4	4	8
OG2_1356	29	4	4	4	3	4	2	4	4	8
OG2_1357	29	3	4	4	4	4	2	4	4	8
OG2_1358	29	4	4	4	3	4	2	4	4	8
OG2_1359	29	4	4	3	4	4	2	4	4	8
OG2_1360	29	4	4	4	3	4	4	3	3	8
OG2_1361	29	5	2	4	5	3	3	3	4	8
OG2_1362	29	4	3	3	4	4	3	4	4	8
OG2_1363	28	1	5	4	4	4	1	3	6	8
OG2_1364	28	4	4	4	3	4	3	3	3	8
OG2_1365	28	4	4	3	4	4	1	4	4	8
OG2_1366	28	4	4	2	4	4	2	4	4	8
OG2_1367	28	4	4	4	4	4	0	4	4	7
OG2_1368	28	4	4	3	4	3	2	4	4	8
OG2_1369	28	4	3	3	4	3	4	4	3	8
OG2_1370	28	4	4	2	4	3	3	4	4	8
OG2_1371	28	4	3	3	5	3	1	5	4	8
OG2_1372	28	3	3	2	5	4	3	5	3	8
OG2_1373	28	3	4	4	3	4	3	3	4	8
OG2_1374	28	3	4	4	4	3	3	4	3	8
OG2_1375	28	3	4	4	3	4	3	4	3	8
OG2_1376	28	4	4	3	4	4	1	4	4	8
OG2_1377	28	3	4	4	3	4	3	4	3	8
OG2_1378	28	3	3	3	3	3	3	3	7	8
OG2_1379	28	5	6	5	0	2	6	2	2	7
OG2_1380	28	4	3	3	5	3	3	4	3	8
OG2_1381	28	4	6	3	1	5	4	4	1	8
OG2_1382	28	3	4	2	3	3	4	4	5	8
OG2_1383	28	3	4	4	3	4	3	4	3	8
OG2_1384	27	3	3	3	3	3	6	3	3	8
OG2_1385	27	3	4	4	3	4	2	3	4	8
OG2_1386	27	4	3	2	4	4	2	4	4	8
OG2_1387	27	4	4	2	4	4	1	4	4	8
OG2_1388	27	4	3	3	3	3	5	3	3	8
OG2_1389	27	3	3	3	3	3	4	4	4	8
OG2_1390	27	4	3	3	2	3	5	4	3	8
OG2_1391	27	5	3	2	3	3	3	5	3	8
OG2_1392	27	3	3	3	3	6	3	3	3	8
OG2_1393	27	4	4	2	4	4	1	4	4	8
OG2_1394	27	4	4	2	4	4	3	3	3	8
OG2_1395	27	3	3	2	5	4	5	2	3	8
OG2_1396	27	3	4	4	3	4	3	3	3	8
OG2_1397	27	4	3	4	3	4	2	3	4	8
OG2_1398	27	4	4	2	4	4	4	1	4	8
OG2_1399	27	4	3	3	4	4	1	4	4	8
OG2_1400	27	4	4	1	4	3	2	4	5	8
OG2_1401	27	3	3	3	5	3	3	4	3	8
OG2_1402	27	4	3	2	4	3	4	3	4	8
OG2_1403	27	1	1	1	0	1	1	1	21	7
OG2_1404	26	4	3	3	3	3	3	3	4	8
OG2_1405	26	3	3	3	3	3	3	5	3	8
OG2_1406	26	4	3	3	3	4	1	4	4	8
OG2_1407	26	4	3	3	4	3	3	2	4	8
OG2_1408	26	3	3	3	3	3	4	4	3	8
OG2_1409	26	3	2	2	3	2	4	2	8	8
OG2_1410	26	3	3	4	3	4	3	3	3	8
OG2_1411	26	3	3	3	4	3	3	4	3	8
OG2_1412	26	4	3	3	3	3	3	4	3	8
OG2_1413	26	3	3	3	2	3	7	2	3	8
OG2_1414	26	3	3	2	3	3	2	5	5	8
OG2_1415	26	3	3	3	3	3	3	5	3	8
OG2_1416	26	3	3	3	3	3	3	3	5	8
OG2_1417	26	3	3	3	3	3	2	3	6	8
OG2_1418	26	4	3	3	3	3	3	4	3	8
OG2_1419	26	3	3	4	4	3	2	4	3	8
OG2_1420	26	2	3	3	3	3	6	2	4	8
OG2_1421	26	3	3	3	7	3	2	3	2	8
OG2_1422	26	3	3	3	4	3	3	4	3	8
OG2_1423	26	1	1	2	13	1	3	3	2	8
OG2_1424	26	3	3	3	3	3	4	4	3	8
OG2_1425	26	4	3	3	5	3	2	3	3	8
OG2_1426	26	4	2	2	6	3	4	2	3	8
OG2_1427	26	3	3	3	3	3	5	2	4	8
OG2_1428	26	4	3	3	3	3	3	3	4	8
OG2_1429	25	3	3	3	4	3	3	3	3	8
OG2_1430	25	3	3	3	3	3	3	4	3	8
OG2_1431	25	4	3	3	3	3	3	3	3	8
OG2_1432	25	3	3	3	3	3	3	4	3	8
OG2_1433	25	3	3	3	3	3	3	3	4	8
OG2_1434	25	3	3	3	3	3	3	4	3	8
OG2_1435	25	3	3	3	3	3	3	4	3	8
OG2_1436	25	3	3	3	3	4	3	3	3	8
OG2_1437	25	3	3	3	3	3	3	4	3	8
OG2_1438	25	4	3	3	3	3	2	4	3	8
OG2_1439	25	3	3	3	4	3	3	3	3	8
OG2_1440	25	3	3	3	3	3	4	3	3	8
OG2_1441	25	3	3	3	3	3	3	4	3	8
OG2_1442	25	3	3	3	3	3	4	3	3	8
OG2_1443	25	4	3	3	3	3	3	3	3	8
OG2_1444	25	3	3	3	2	3	5	3	3	8
OG2_1445	25	3	3	3	3	3	4	3	3	8
OG2_1446	25	3	3	3	3	3	5	2	3	8
OG2_1447	25	3	3	3	3	3	4	3	3	8
OG2_1448	25	3	3	3	2	3	3	5	3	8
OG2_1449	25	2	4	4	2	4	2	2	5	8
OG2_1450	25	3	3	3	3	3	3	4	3	8
OG2_1451	25	6	2	2	4	2	1	5	3	8
OG2_1452	25	5	1	1	0	4	1	0	13	6
OG2_1453	25	3	3	3	3	3	5	2	3	8
OG2_1454	25	3	3	3	3	3	4	3	3	8
OG2_1455	25	3	3	3	3	3	3	4	3	8
OG2_1456	25	4	4	3	3	4	1	3	3	8
OG2_1457	25	3	3	3	3	3	3	4	3	8
OG2_1458	25	3	3	4	3	3	3	3	3	8
OG2_1459	25	2	3	2	3	4	8	2	1	8
OG2_1460	25	3	5	4	3	3	3	2	2	8
OG2_1461	25	3	3	3	3	4	3	3	3	8
OG2_1462	25	3	3	3	4	3	3	3	3	8
OG2_1463	25	3	3	3	3	3	4	3	3	8
OG2_1464	25	2	7	6	4	2	1	1	2	8
OG2_1465	25	1	1	2	1	2	2	2	14	8
OG2_1466	25	3	3	3	3	3	3	4	3	8
OG2_1467	25	3	3	3	3	3	3	4	3	8
OG2_1468	25	3	3	3	3	3	3	4	3	8
OG2_1469	24	3	3	3	3	3	3	3	3	8
OG2_1470	24	3	3	3	3	3	3	3	3	8
OG2_1471	24	3	3	3	3	3	3	3	3	8
OG2_1472	24	3	3	3	3	3	1	5	3	8
OG2_1473	24	3	3	3	3	3	2	4	3	8
OG2_1474	24	3	3	3	3	4	3	2	3	8
OG2_1475	24	3	3	3	3	3	3	3	3	8
OG2_1476	24	3	3	3	3	3	3	3	3	8
OG2_1477	24	3	3	3	3	3	3	3	3	8
OG2_1478	24	3	3	3	3	3	2	4	3	8
OG2_1479	24	3	3	3	3	3	3	3	3	8
OG2_1480	24	3	3	3	3	3	2	4	3	8
OG2_1481	24	3	3	3	3	3	3	3	3	8
OG2_1482	24	3	2	3	3	3	2	3	5	8
OG2_1483	24	3	3	3	3	3	3	3	3	8
OG2_1484	24	3	3	3	3	3	3	3	3	8
OG2_1485	24	3	3	3	3	3	3	3	3	8
OG2_1486	24	3	3	3	3	3	3	3	3	8
OG2_1487	24	3	3	3	3	3	3	3	3	8
OG2_1488	24	4	3	3	3	3	2	3	3	8
OG2_1489	24	3	3	3	3	3	3	3	3	8
OG2_1490	24	3	3	3	3	3	3	3	3	8
OG2_1491	24	3	3	3	3	3	3	3	3	8
OG2_1492	24	3	3	3	3	3	3	3	3	8
OG2_1493	24	3	3	3	3	3	3	3	3	8
OG2_1494	24	4	3	3	3	3	2	3	3	8
OG2_1495	24	3	3	3	3	3	3	3	3	8
OG2_1496	24	3	3	2	3	3	4	3	3	8
OG2_1497	24	3	3	3	3	3	3	3	3	8
OG2_1498	24	3	3	3	3	3	3	3	3	8
OG2_1499	24	3	3	3	3	3	3	3	3	8
OG2_1500	24	3	3	3	3	3	3	3	3	8
OG2_1501	24	3	3	3	3	3	3	3	3	8
OG2_1502	24	3	3	3	3	3	3	3	3	8
OG2_1503	24	3	3	3	3	3	3	3	3	8
OG2_1504	24	3	3	3	3	3	3	3	3	8
OG2_1505	24	3	3	3	0	4	10	1	0	6
OG2_1506	24	3	3	3	3	3	3	3	3	8
OG2_1507	24	3	3	3	3	3	3	3	3	8
OG2_1508	24	3	3	3	3	3	3	3	3	8
OG2_1509	24	3	3	3	3	3	3	3	3	8
OG2_1510	24	3	3	3	3	3	3	3	3	8
OG2_1511	24	3	3	3	3	3	3	3	3	8
OG2_1512	24	2	3	3	4	3	3	3	3	8
OG2_1513	24	3	3	3	3	3	3	3	3	8
OG2_1514	24	3	3	3	3	3	3	3	3	8
OG2_1515	24	3	3	3	3	3	3	3	3	8
OG2_1516	24	3	3	2	3	3	2	5	3	8
OG2_1517	24	3	3	3	3	3	3	3	3	8
OG2_1518	24	3	3	3	3	3	3	3	3	8
OG2_1519	24	3	3	3	3	3	3	3	3	8
OG2_1520	24	3	3	3	3	3	3	3	3	8
OG2_1521	24	3	3	3	3	3	3	3	3	8
OG2_1522	24	3	3	3	3	3	3	3	3	8
OG2_1523	24	3	3	3	3	3	3	3	3	8
OG2_1524	24	3	3	3	3	3	3	3	3	8
OG2_1525	24	3	3	3	2	3	3	3	4	8
OG2_1526	24	3	3	3	3	3	3	3	3	8
OG2_1527	24	3	3	3	3	3	3	3	3	8
OG2_1528	24	3	3	3	3	3	3	3	3	8
OG2_1529	24	3	3	3	3	3	3	3	3	8
OG2_1530	24	3	3	3	3	3	3	3	3	8
OG2_1531	24	3	3	3	3	3	3	3	3	8
OG2_1532	24	3	3	3	3	3	3	3	3	8
OG2_1533	24	3	3	3	3	3	3	3	3	8
OG2_1534	24	3	3	3	3	3	3	3	3	8
OG2_1535	24	3	3	3	3	3	3	3	3	8
OG2_1536	24	3	3	3	3	3	3	3	3	8
OG2_1537	24	3	3	3	3	3	3	3	3	8
OG2_1538	24	3	3	2	3	2	5	3	3	8
OG2_1539	24	3	3	3	3	3	3	3	3	8
OG2_1540	24	4	3	3	3	3	3	2	3	8
OG2_1541	24	3	3	3	3	3	3	3	3	8
OG2_1542	24	3	3	3	3	3	2	4	3	8
OG2_1543	24	3	3	3	3	3	3	3	3	8
OG2_1544	24	3	3	3	3	3	3	3	3	8
OG2_1545	24	3	3	3	3	3	3	3	3	8
OG2_1546	24	3	3	3	3	3	3	3	3	8
OG2_1547	24	3	3	3	3	3	2	4	3	8
OG2_1548	24	1	4	4	0	5	9	1	0	6
OG2_1549	24	3	3	3	2	3	4	3	3	8
OG2_1550	24	3	3	3	3	3	3	3	3	8
OG2_1551	24	3	3	3	3	3	3	3	3	8
OG2_1552	24	3	3	3	3	3	3	3	3	8
OG2_1553	24	3	3	3	3	3	3	3	3	8
OG2_1554	24	3	3	3	3	3	2	4	3	8
OG2_1555	24	3	3	3	3	3	3	3	3	8
OG2_1556	24	2	3	2	3	3	3	5	3	8
OG2_1557	24	4	2	1	3	3	5	3	3	8
OG2_1558	24	3	3	3	3	3	3	3	3	8
OG2_1559	24	3	3	3	3	3	1	5	3	8
OG2_1560	24	3	3	3	3	3	3	3	3	8
OG2_1561	24	3	3	3	3	3	3	3	3	8
OG2_1562	24	3	3	3	3	3	3	3	3	8
OG2_1563	24	3	3	3	3	3	3	3	3	8
OG2_1564	24	3	3	3	3	3	3	3	3	8
OG2_1565	24	3	3	3	3	3	3	3	3	8
OG2_1566	24	3	3	3	3	3	3	3	3	8
OG2_1567	24	3	3	3	3	3	3	3	3	8
OG2_1568	24	3	3	3	3	3	3	3	3	8
OG2_1569	24	4	6	0	5	2	2	5	0	6
OG2_1570	24	3	3	3	3	3	3	3	3	8
OG2_1571	24	3	3	3	3	3	3	3	3	8
OG2_1572	24	3	3	3	3	3	3	3	3	8
OG2_1573	24	3	3	3	3	3	3	3	3	8
OG2_1574	24	2	0	0	4	0	3	2	13	5
OG2_1575	24	3	3	3	3	3	3	3	3	8
OG2_1576	24	3	2	2	2	3	2	4	6	8
OG2_1577	24	3	3	3	3	3	3	3	3	8
OG2_1578	24	3	3	3	3	3	3	3	3	8
OG2_1579	24	3	3	3	3	3	3	3	3	8
OG2_1580	24	3	3	3	3	3	3	3	3	8
OG2_1581	24	3	3	3	3	3	3	3	3	8
OG2_1582	24	3	3	3	3	3	3	3	3	8
OG2_1583	24	3	3	3	3	3	3	3	3	8
OG2_1584	24	3	3	3	3	3	3	3	3	8
OG2_1585	24	3	3	3	4	3	2	3	3	8
OG2_1586	24	3	3	3	3	3	3	3	3	8
OG2_1587	23	3	3	3	3	3	2	3	3	8
OG2_1588	23	2	3	3	2	3	5	2	3	8
OG2_1589	23	3	3	3	3	3	2	2	4	8
OG2_1590	23	3	3	3	3	3	3	3	2	8
OG2_1591	23	3	3	3	3	3	2	3	3	8
OG2_1592	23	3	3	3	3	3	2	3	3	8
OG2_1593	23	3	3	3	2	3	3	3	3	8
OG2_1594	23	2	3	3	3	3	3	3	3	8
OG2_1595	23	3	3	3	2	3	3	3	3	8
OG2_1596	23	2	3	3	3	3	3	2	4	8
OG2_1597	23	3	3	3	3	3	3	2	3	8
OG2_1598	23	3	3	2	3	3	2	4	3	8
OG2_1599	23	3	3	2	3	3	2	4	3	8
OG2_1600	23	3	3	3	3	3	4	2	2	8
OG2_1601	23	3	3	3	3	3	2	3	3	8
OG2_1602	23	3	3	3	3	3	3	2	3	8
OG2_1603	23	3	3	3	2	3	3	3	3	8
OG2_1604	23	3	3	3	3	3	2	3	3	8
OG2_1605	23	3	3	2	3	3	3	3	3	8
OG2_1606	23	3	3	3	3	3	1	3	4	8
OG2_1607	23	3	3	3	3	3	2	3	3	8
OG2_1608	23	2	3	3	3	3	3	3	3	8
OG2_1609	23	3	3	2	3	4	2	3	3	8
OG2_1610	23	3	3	3	3	3	2	3	3	8
OG2_1611	23	3	3	1	3	3	4	3	3	8
OG2_1612	23	3	3	3	3	3	2	3	3	8
OG2_1613	23	3	3	3	3	3	3	2	3	8
OG2_1614	23	2	3	3	3	3	3	3	3	8
OG2_1615	23	3	3	3	3	3	2	3	3	8
OG2_1616	23	3	3	2	3	3	3	3	3	8
OG2_1617	23	3	3	3	3	3	2	3	3	8
OG2_1618	23	3	3	3	3	3	2	3	3	8
OG2_1619	23	3	3	3	3	3	3	2	3	8
OG2_1620	23	3	3	3	2	3	3	2	4	8
OG2_1621	23	4	3	3	2	3	2	3	3	8
OG2_1622	23	3	3	3	3	3	3	2	3	8
OG2_1623	23	3	3	3	3	3	2	3	3	8
OG2_1624	23	3	2	3	3	3	2	4	3	8
OG2_1625	23	3	3	3	3	3	3	3	2	8
OG2_1626	23	3	3	3	3	3	2	3	3	8
OG2_1627	23	3	3	3	2	3	3	3	3	8
OG2_1628	23	4	3	3	2	3	3	2	3	8
OG2_1629	23	3	3	3	3	3	2	3	3	8
OG2_1630	23	3	3	3	3	3	2	3	3	8
OG2_1631	23	3	3	3	3	3	3	2	3	8
OG2_1632	23	3	3	3	3	3	2	3	3	8
OG2_1633	23	3	3	3	3	3	2	3	3	8
OG2_1634	23	3	3	2	3	3	3	3	3	8
OG2_1635	23	3	3	3	3	3	3	2	3	8
OG2_1636	23	3	3	3	3	3	2	3	3	8
OG2_1637	23	3	3	3	3	3	2	3	3	8
OG2_1638	23	5	3	4	3	2	3	2	1	8
OG2_1639	23	3	3	3	3	3	3	1	4	8
OG2_1640	23	3	3	3	3	3	2	3	3	8
OG2_1641	23	3	3	3	3	3	3	2	3	8
OG2_1642	23	3	3	3	3	3	3	3	2	8
OG2_1643	23	3	3	3	3	3	3	2	3	8
OG2_1644	23	2	2	2	2	3	2	2	8	8
OG2_1645	23	3	3	3	2	3	3	3	3	8
OG2_1646	23	3	3	3	4	3	2	2	3	8
OG2_1647	23	3	3	3	3	3	2	3	3	8
OG2_1648	23	3	3	3	3	3	2	3	3	8
OG2_1649	23	3	3	3	3	3	3	2	3	8
OG2_1650	23	4	4	4	3	4	0	2	2	7
OG2_1651	23	3	3	3	2	3	4	2	3	8
OG2_1652	23	3	3	3	3	3	2	3	3	8
OG2_1653	23	2	7	5	0	2	1	5	1	7
OG2_1654	23	3	3	3	3	3	2	3	3	8
OG2_1655	23	3	3	2	3	3	3	3	3	8
OG2_1656	23	1	0	1	3	2	3	1	12	7
OG2_1657	23	3	2	2	3	2	2	3	6	8
OG2_1658	23	3	3	3	3	3	2	3	3	8
OG2_1659	23	3	3	3	3	3	2	3	3	8
OG2_1660	23	3	3	3	3	3	2	3	3	8
OG2_1661	23	3	3	3	3	3	2	3	3	8
OG2_1662	23	3	4	2	3	3	2	3	3	8
OG2_1663	23	3	3	3	3	3	3	2	3	8
OG2_1664	23	3	3	3	3	2	3	3	3	8
OG2_1665	23	3	2	3	3	3	3	3	3	8
OG2_1666	23	3	3	3	3	3	2	3	3	8
OG2_1667	23	3	3	3	3	3	3	2	3	8
OG2_1668	23	3	3	3	2	3	3	3	3	8
OG2_1669	23	3	3	3	3	3	2	3	3	8
OG2_1670	23	3	3	2	3	3	3	3	3	8
OG2_1671	23	3	3	3	3	3	3	2	3	8
OG2_1672	22	3	3	3	2	3	2	3	3	8
OG2_1673	22	3	2	2	3	2	2	5	3	8
OG2_1674	22	3	3	2	3	3	3	2	3	8
OG2_1675	22	2	3	3	2	3	3	3	3	8
OG2_1676	22	3	3	2	3	3	2	3	3	8
OG2_1677	22	3	3	2	3	3	3	3	2	8
OG2_1678	22	3	2	2	3	3	3	3	3	8
OG2_1679	22	3	3	1	4	4	2	4	1	8
OG2_1680	22	3	3	2	3	3	2	3	3	8
OG2_1681	22	3	3	3	2	3	3	3	2	8
OG2_1682	22	3	3	3	3	2	2	3	3	8
OG2_1683	22	3	3	3	3	3	2	2	3	8
OG2_1684	22	3	3	2	3	3	2	3	3	8
OG2_1685	22	3	3	3	3	3	1	3	3	8
OG2_1686	22	4	2	2	3	2	3	3	3	8
OG2_1687	22	3	3	2	3	3	1	4	3	8
OG2_1688	22	2	3	3	3	3	3	2	3	8
OG2_1689	22	3	3	2	3	3	2	3	3	8
OG2_1690	22	3	2	2	3	3	3	3	3	8
OG2_1691	22	5	4	4	1	5	2	1	0	7
OG2_1692	22	3	3	2	3	3	2	3	3	8
OG2_1693	22	3	3	3	3	3	2	2	3	8
OG2_1694	22	3	3	3	3	3	1	3	3	8
OG2_1695	22	3	3	3	3	3	2	2	3	8
OG2_1696	22	3	3	2	3	3	2	3	3	8
OG2_1697	22	3	3	2	3	3	3	3	2	8
OG2_1698	22	3	3	3	3	2	2	3	3	8
OG2_1699	22	2	4	4	2	4	2	0	4	7
OG2_1700	22	3	3	2	3	3	2	3	3	8
OG2_1701	22	3	3	3	2	3	3	2	3	8
OG2_1702	22	3	2	2	3	3	2	4	3	8
OG2_1703	22	2	3	2	3	3	2	4	3	8
OG2_1704	22	3	3	3	1	3	4	4	1	8
OG2_1705	22	3	3	2	3	3	2	3	3	8
OG2_1706	22	2	3	3	3	3	2	3	3	8
OG2_1707	22	1	3	3	4	2	2	2	5	8
OG2_1708	22	3	3	3	3	3	2	2	3	8
OG2_1709	22	3	3	2	3	3	2	2	4	8
OG2_1710	22	3	3	2	2	3	3	3	3	8
OG2_1711	22	3	3	3	2	3	3	2	3	8
OG2_1712	22	3	3	2	3	3	2	3	3	8
OG2_1713	22	2	4	5	2	2	4	1	2	8
OG2_1714	22	0	16	0	0	6	0	0	0	2
OG2_1715	22	3	3	3	3	3	2	2	3	8
OG2_1716	22	3	3	3	3	3	1	3	3	8
OG2_1717	22	3	3	2	4	3	2	2	3	8
OG2_1718	22	1	0	0	6	1	1	2	11	6
OG2_1719	22	3	3	2	2	3	3	3	3	8
OG2_1720	22	1	1	1	1	1	1	1	15	8
OG2_1721	22	3	3	3	3	3	2	2	3	8
OG2_1722	22	2	3	2	3	3	3	3	3	8
OG2_1723	22	3	3	2	3	3	3	2	3	8
OG2_1724	22	3	3	3	2	3	3	2	3	8
OG2_1725	22	0	0	0	1	0	18	3	0	3
OG2_1726	22	3	3	2	3	3	2	3	3	8
OG2_1727	22	2	3	3	3	3	3	2	3	8
OG2_1728	22	3	3	2	3	3	2	3	3	8
OG2_1729	22	3	3	3	3	3	2	2	3	8
OG2_1730	22	3	3	2	3	3	2	3	3	8
OG2_1731	22	3	3	3	3	2	2	3	3	8
OG2_1732	21	3	3	3	3	3	2	1	3	8
OG2_1733	21	3	3	2	3	2	2	3	3	8
OG2_1734	21	2	2	2	3	3	2	4	3	8
OG2_1735	21	2	3	2	4	4	2	3	1	8
OG2_1736	21	3	3	2	3	3	1	3	3	8
OG2_1737	21	3	3	3	3	2	3	2	2	8
OG2_1738	21	3	2	2	4	2	2	3	3	8
OG2_1739	21	3	3	3	3	2	2	2	3	8
OG2_1740	21	3	3	2	3	3	1	3	3	8
OG2_1741	21	3	3	2	2	3	2	3	3	8
OG2_1742	21	3	3	2	3	3	1	3	3	8
OG2_1743	21	3	3	1	3	3	2	3	3	8
OG2_1744	21	3	3	2	3	3	2	2	3	8
OG2_1745	21	3	3	3	3	3	1	2	3	8
OG2_1746	21	3	3	2	3	3	2	2	3	8
OG2_1747	21	3	2	3	0	3	9	1	0	6
OG2_1748	21	2	2	2	3	3	3	3	3	8
OG2_1749	21	1	3	3	1	3	2	3	5	8
OG2_1750	21	3	3	1	3	3	2	3	3	8
OG2_1751	21	2	3	3	3	3	2	3	2	8
OG2_1752	21	3	3	2	2	2	3	3	3	8
OG2_1753	21	3	3	3	2	3	3	2	2	8
OG2_1754	21	2	5	4	1	3	4	1	1	8
OG2_1755	21	3	3	3	2	3	1	4	2	8
OG2_1756	21	3	2	3	3	1	3	3	3	8
OG2_1757	21	3	2	3	3	2	2	3	3	8
OG2_1758	21	3	2	2	2	2	5	3	2	8
OG2_1759	21	5	3	5	0	2	2	1	3	7
OG2_1760	21	0	2	1	0	0	1	1	16	5
OG2_1761	21	2	3	3	2	3	2	2	4	8
OG2_1762	21	3	3	2	3	3	1	3	3	8
OG2_1763	21	3	2	1	3	3	3	3	3	8
OG2_1764	21	3	2	2	3	2	2	4	3	8
OG2_1765	21	3	3	1	3	3	2	3	3	8
OG2_1766	21	3	2	2	3	3	1	4	3	8
OG2_1767	20	2	3	2	3	3	3	1	3	8
OG2_1768	20	3	3	3	2	3	2	3	1	8
OG2_1769	20	3	1	2	3	3	2	3	3	8
OG2_1770	20	0	4	3	3	4	1	1	4	7
OG2_1771	20	2	2	3	3	2	2	3	3	8
OG2_1772	20	2	2	3	2	2	3	3	3	8
OG2_1773	20	3	3	2	2	3	2	3	2	8
OG2_1774	20	3	2	3	3	3	2	1	3	8
OG2_1775	20	2	3	2	3	3	1	2	4	8
OG2_1776	20	4	3	3	1	3	3	1	2	8
OG2_1777	20	2	3	4	3	4	1	1	2	8
OG2_1778	20	2	3	3	2	3	3	2	2	8
OG2_1779	20	4	3	3	1	3	3	3	0	7
OG2_1780	20	3	2	2	2	2	1	4	4	8
OG2_1781	20	3	2	2	4	2	2	2	3	8
OG2_1782	20	3	3	2	4	1	4	2	1	8
OG2_1783	20	4	3	1	5	1	1	2	3	8
OG2_1784	20	2	3	4	2	3	2	2	2	8
OG2_1785	20	2	2	2	5	2	2	2	3	8
OG2_1786	20	4	2	2	4	2	2	3	1	8
OG2_1787	20	3	2	2	2	2	2	2	5	8
OG2_1788	20	3	3	3	2	3	2	2	2	8
OG2_1789	20	0	0	0	0	0	0	0	20	1
OG2_1790	20	3	4	3	1	0	6	2	1	7
OG2_1791	20	3	3	3	3	2	3	1	2	8
OG2_1792	19	3	2	2	2	2	3	3	2	8
OG2_1793	19	3	3	2	2	2	3	1	3	8
OG2_1794	19	2	3	2	2	2	3	3	2	8
OG2_1795	19	2	3	2	2	3	1	3	3	8
OG2_1796	19	2	2	3	3	2	2	3	2	8
OG2_1797	19	3	2	2	3	2	3	2	2	8
OG2_1798	19	1	3	2	3	4	3	2	1	8
OG2_1799	19	4	3	3	3	3	1	1	1	8
OG2_1800	19	2	4	1	3	4	2	2	1	8
OG2_1801	19	1	2	2	1	2	6	4	1	8
OG2_1802	19	4	3	2	1	3	1	2	3	8
OG2_1803	19	0	3	1	4	2	5	3	1	7
OG2_1804	19	4	1	2	3	3	1	4	1	8
OG2_1805	19	2	1	1	6	1	3	2	3	8
OG2_1806	19	1	3	1	3	4	3	0	4	7
OG2_1807	19	1	2	3	1	2	1	1	8	8
OG2_1808	19	4	2	2	2	2	2	2	3	8
OG2_1809	19	0	0	0	0	0	0	0	19	1
OG2_1810	19	2	3	3	1	3	2	2	3	8
OG2_1811	19	4	1	2	2	3	2	3	2	8
OG2_1812	19	3	2	2	2	2	3	3	2	8
OG2_1813	19	3	2	1	4	2	1	3	3	8
OG2_1814	19	3	3	1	3	3	1	2	3	8
OG2_1815	19	2	3	3	2	2	2	3	2	8
OG2_1816	19	2	3	3	2	3	2	2	2	8
OG2_1817	19	0	1	0	1	2	8	7	0	5
OG2_1818	19	0	0	0	0	0	0	19	0	1
OG2_1819	18	2	2	2	2	2	3	3	2	8
OG2_1820	18	2	3	3	2	3	1	2	2	8
OG2_1821	18	2	2	2	2	2	3	3	2	8
OG2_1822	18	3	3	1	2	3	1	2	3	8
OG2_1823	18	2	2	2	2	2	6	0	2	7
OG2_1824	18	3	2	2	2	2	2	3	2	8
OG2_1825	18	5	4	3	0	2	0	1	3	6
OG2_1826	18	2	2	3	2	2	2	2	3	8
OG2_1827	18	3	2	2	1	2	2	4	2	8
OG2_1828	18	1	2	2	2	2	5	2	2	8
OG2_1829	18	4	2	2	2	2	0	2	4	7
OG2_1830	18	2	2	2	2	2	4	2	2	8
OG2_1831	18	3	2	1	3	2	3	1	3	8
OG2_1832	18	2	3	2	2	3	2	2	2	8
OG2_1833	18	3	3	3	3	3	0	1	2	7
OG2_1834	18	2	2	2	2	2	3	3	2	8
OG2_1835	18	2	2	2	2	3	2	3	2	8
OG2_1836	18	1	3	3	1	3	2	3	2	8
OG2_1837	18	0	2	2	1	2	9	1	1	7
OG2_1838	18	2	2	2	2	2	2	2	4	8
OG2_1839	18	2	2	2	3	2	2	2	3	8
OG2_1840	18	2	3	3	2	3	2	1	2	8
OG2_1841	18	2	2	2	2	2	3	3	2	8
OG2_1842	18	2	2	2	4	2	2	2	2	8
OG2_1843	18	1	2	1	3	2	6	3	0	7
OG2_1844	18	3	2	2	2	2	4	2	1	8
OG2_1845	18	2	3	2	3	3	3	0	2	7
OG2_1846	18	3	2	2	3	2	2	2	2	8
OG2_1847	18	2	2	2	2	2	2	3	3	8
OG2_1848	18	2	2	2	2	2	4	2	2	8
OG2_1849	18	3	1	2	2	2	3	3	2	8
OG2_1850	18	2	2	2	2	2	2	3	3	8
OG2_1851	18	0	2	1	1	2	3	2	7	7
OG2_1852	18	3	2	2	2	2	2	3	2	8
OG2_1853	18	2	2	2	2	2	2	4	2	8
OG2_1854	18	1	3	2	2	4	1	2	3	8
OG2_1855	18	2	2	2	2	2	4	2	2	8
OG2_1856	18	2	2	2	2	2	2	4	2	8
OG2_1857	18	3	2	2	3	2	2	2	2	8
OG2_1858	18	2	2	2	2	2	2	4	2	8
OG2_1859	18	2	2	2	2	2	4	2	2	8
OG2_1860	18	0	0	0	0	0	18	0	0	1
OG2_1861	18	3	2	2	3	2	2	1	3	8
OG2_1862	18	2	3	3	2	3	2	1	2	8
OG2_1863	17	1	3	3	2	2	0	3	3	7
OG2_1864	17	2	2	2	2	2	2	3	2	8
OG2_1865	17	2	2	2	2	2	3	2	2	8
OG2_1866	17	2	2	2	3	2	2	2	2	8
OG2_1867	17	3	2	2	2	2	2	2	2	8
OG2_1868	17	2	3	3	2	2	2	1	2	8
OG2_1869	17	2	2	2	2	2	2	3	2	8
OG2_1870	17	2	2	2	2	2	2	3	2	8
OG2_1871	17	3	2	2	2	2	2	2	2	8
OG2_1872	17	2	2	2	2	2	2	2	3	8
OG2_1873	17	2	2	2	2	2	2	3	2	8
OG2_1874	17	3	2	2	2	2	2	2	2	8
OG2_1875	17	2	2	2	2	2	1	2	4	8
OG2_1876	17	2	3	2	2	2	2	2	2	8
OG2_1877	17	2	2	2	2	2	3	2	2	8
OG2_1878	17	2	2	2	3	2	2	2	2	8
OG2_1879	17	4	2	2	2	2	1	1	3	8
OG2_1880	17	2	2	2	2	3	2	2	2	8
OG2_1881	17	2	2	2	2	2	2	2	3	8
OG2_1882	17	2	2	2	3	2	2	2	2	8
OG2_1883	17	1	2	2	2	2	4	1	3	8
OG2_1884	17	2	2	2	2	2	2	3	2	8
OG2_1885	17	2	2	2	2	2	2	3	2	8
OG2_1886	17	3	2	2	2	2	2	2	2	8
OG2_1887	17	2	2	2	2	2	2	3	2	8
OG2_1888	17	3	2	2	2	2	2	2	2	8
OG2_1889	17	2	2	1	2	2	2	4	2	8
OG2_1890	17	2	2	2	2	2	2	3	2	8
OG2_1891	17	2	2	2	2	2	2	3	2	8
OG2_1892	17	2	2	2	2	2	2	2	3	8
OG2_1893	17	2	2	2	2	2	2	3	2	8
OG2_1894	17	3	2	2	3	2	0	2	3	7
OG2_1895	17	2	2	2	2	2	2	2	3	8
OG2_1896	17	2	2	2	3	2	2	2	2	8
OG2_1897	17	2	2	2	3	2	2	2	2	8
OG2_1898	17	2	2	2	2	2	3	2	2	8
OG2_1899	17	2	2	2	2	3	2	2	2	8
OG2_1900	17	3	2	2	2	2	2	2	2	8
OG2_1901	17	2	2	2	2	2	2	3	2	8
OG2_1902	17	3	3	2	2	3	1	1	2	8
OG2_1903	17	5	2	1	2	2	2	2	1	8
OG2_1904	17	3	2	2	2	2	2	2	2	8
OG2_1905	17	3	3	3	1	3	1	1	2	8
OG2_1906	17	2	2	2	2	2	2	3	2	8
OG2_1907	17	3	3	1	2	2	2	3	1	8
OG2_1908	17	2	2	2	2	3	2	2	2	8
OG2_1909	17	1	4	4	1	4	0	1	2	7
OG2_1910	17	2	2	2	2	2	2	2	3	8
OG2_1911	17	2	3	2	2	3	2	2	1	8
OG2_1912	17	2	2	2	2	2	3	2	2	8
OG2_1913	17	2	2	2	1	2	3	3	2	8
OG2_1914	17	1	4	3	0	3	4	1	1	7
OG2_1915	17	3	3	1	0	2	4	3	1	7
OG2_1916	17	2	2	2	2	2	1	2	4	8
OG2_1917	17	2	2	2	2	2	3	2	2	8
OG2_1918	17	2	2	2	2	2	3	2	2	8
OG2_1919	17	2	2	2	3	2	2	2	2	8
OG2_1920	17	2	3	2	2	3	2	2	1	8
OG2_1921	17	2	3	3	1	3	2	2	1	8
OG2_1922	17	3	2	2	2	2	2	2	2	8
OG2_1923	17	3	3	3	1	2	2	1	2	8
OG2_1924	17	2	2	2	2	2	2	2	3	8
OG2_1925	17	2	2	2	2	2	2	3	2	8
OG2_1926	17	3	2	2	2	2	2	2	2	8
OG2_1927	17	1	3	2	3	2	5	0	1	7
OG2_1928	17	2	2	2	2	2	2	2	3	8
OG2_1929	17	3	2	2	2	2	2	2	2	8
OG2_1930	17	2	2	2	3	2	2	2	2	8
OG2_1931	17	2	2	2	2	2	2	2	3	8
OG2_1932	17	2	2	2	2	2	2	3	2	8
OG2_1933	17	2	2	2	2	2	2	2	3	8
OG2_1934	17	1	2	2	3	2	3	2	2	8
OG2_1935	17	2	2	2	3	2	2	2	2	8
OG2_1936	17	3	2	2	2	2	2	2	2	8
OG2_1937	17	2	2	2	3	2	2	2	2	8
OG2_1938	17	2	2	2	3	2	2	2	2	8
OG2_1939	17	1	4	3	2	1	2	3	1	8
OG2_1940	17	3	1	1	3	1	2	2	4	8
OG2_1941	17	2	2	2	3	2	2	2	2	8
OG2_1942	17	2	2	2	3	2	3	2	1	8
OG2_1943	17	2	2	2	3	2	2	2	2	8
OG2_1944	17	2	2	2	2	2	2	2	3	8
OG2_1945	17	2	2	2	2	2	2	2	3	8
OG2_1946	17	2	2	2	2	2	2	3	2	8
OG2_1947	17	2	2	2	2	2	2	2	3	8
OG2_1948	17	0	0	0	0	0	0	0	17	1
OG2_1949	17	0	0	0	0	0	0	0	17	1
OG2_1950	17	2	2	2	2	2	1	3	3	8
OG2_1951	17	2	2	2	2	2	2	2	3	8
OG2_1952	17	2	2	2	2	2	2	2	3	8
OG2_1953	17	2	2	2	2	2	2	2	3	8
OG2_1954	17	2	2	2	2	2	2	2	3	8
OG2_1955	17	2	2	2	2	2	1	3	3	8
OG2_1956	17	2	2	2	2	2	2	2	3	8
OG2_1957	17	2	2	2	2	2	2	2	3	8
OG2_1958	17	2	2	2	2	2	2	3	2	8
OG2_1959	17	2	2	2	2	2	2	2	3	8
OG2_1960	17	2	2	2	2	2	2	2	3	8
OG2_1961	17	2	2	2	2	2	2	2	3	8
OG2_1962	17	2	2	2	2	2	2	2	3	8
OG2_1963	17	2	2	2	2	2	2	2	3	8
OG2_1964	17	2	2	3	2	2	2	2	2	8
OG2_1965	17	2	2	2	2	2	2	3	2	8
OG2_1966	17	2	2	2	2	2	2	3	2	8
OG2_1967	17	2	2	2	2	2	2	3	2	8
OG2_1968	17	2	2	2	2	2	3	2	2	8
OG2_1969	17	2	2	2	2	2	2	3	2	8
OG2_1970	17	2	2	2	2	2	2	3	2	8
OG2_1971	17	2	2	2	2	2	3	2	2	8
OG2_1972	17	2	2	2	2	2	3	2	2	8
OG2_1973	17	2	2	3	2	2	1	3	2	8
OG2_1974	17	2	2	2	2	2	2	2	3	8
OG2_1975	17	2	2	2	2	2	3	2	2	8
OG2_1976	17	2	2	2	2	2	3	2	2	8
OG2_1977	17	2	2	2	2	2	3	2	2	8
OG2_1978	17	2	2	2	2	2	2	3	2	8
OG2_1979	17	2	3	2	2	2	1	3	2	8
OG2_1980	17	2	2	2	2	2	2	3	2	8
OG2_1981	17	2	2	2	2	2	2	3	2	8
OG2_1982	17	2	2	2	2	2	2	3	2	8
OG2_1983	17	2	2	2	2	2	2	3	2	8
OG2_1984	17	2	2	2	2	2	2	3	2	8
OG2_1985	17	3	2	2	2	2	2	2	2	8
OG2_1986	17	2	2	2	2	2	2	3	2	8
OG2_1987	17	2	2	2	2	2	3	2	2	8
OG2_1988	17	5	0	1	2	0	3	3	3	6
OG2_1989	17	2	1	1	0	1	10	1	1	7
OG2_1990	17	2	2	3	2	2	2	2	2	8
OG2_1991	17	2	2	2	2	2	3	2	2	8
OG2_1992	17	1	2	1	3	1	6	2	1	8
OG2_1993	16	2	2	2	2	2	2	2	2	8
OG2_1994	16	2	2	2	2	2	2	2	2	8
OG2_1995	16	2	2	2	2	2	2	2	2	8
OG2_1996	16	2	2	2	2	2	2	2	2	8
OG2_1997	16	2	2	2	2	2	2	2	2	8
OG2_1998	16	2	2	1	4	2	1	2	2	8
OG2_1999	16	2	2	2	2	2	2	2	2	8
OG2_2000	16	2	2	2	2	2	2	2	2	8
OG2_2001	16	2	3	2	2	2	3	1	1	8
OG2_2002	16	2	2	2	2	2	2	2	2	8
OG2_2003	16	2	2	2	2	2	2	2	2	8
OG2_2004	16	2	2	2	2	2	2	2	2	8
OG2_2005	16	2	2	2	2	2	2	2	2	8
OG2_2006	16	2	2	2	2	2	2	2	2	8
OG2_2007	16	2	2	2	2	2	2	2	2	8
OG2_2008	16	2	2	2	2	2	2	2	2	8
OG2_2009	16	2	2	2	2	2	2	2	2	8
OG2_2010	16	1	2	2	2	2	2	3	2	8
OG2_2011	16	2	2	2	2	2	2	2	2	8
OG2_2012	16	2	2	2	2	2	2	2	2	8
OG2_2013	16	2	2	2	2	2	2	2	2	8
OG2_2014	16	2	2	2	2	2	2	2	2	8
OG2_2015	16	2	2	2	2	2	1	3	2	8
OG2_2016	16	2	2	2	2	2	2	2	2	8
OG2_2017	16	2	2	2	2	2	2	2	2	8
OG2_2018	16	2	2	2	2	2	2	2	2	8
OG2_2019	16	2	2	2	2	2	2	2	2	8
OG2_2020	16	2	2	2	2	2	2	2	2	8
OG2_2021	16	2	2	2	2	2	2	2	2	8
OG2_2022	16	2	2	2	2	2	1	3	2	8
OG2_2023	16	2	2	2	2	2	2	2	2	8
OG2_2024	16	2	2	2	2	2	2	2	2	8
OG2_2025	16	2	2	2	2	2	2	2	2	8
OG2_2026	16	2	2	2	2	2	2	2	2	8
OG2_2027	16	2	2	2	2	2	2	2	2	8
OG2_2028	16	2	2	2	2	2	2	2	2	8
OG2_2029	16	2	2	2	2	2	2	2	2	8
OG2_2030	16	2	2	2	2	2	2	2	2	8
OG2_2031	16	2	1	2	2	2	3	1	3	8
OG2_2032	16	2	2	2	2	2	2	2	2	8
OG2_2033	16	2	2	2	2	2	2	2	2	8
OG2_2034	16	2	2	2	2	2	2	2	2	8
OG2_2035	16	2	2	2	2	2	2	2	2	8
OG2_2036	16	2	2	2	2	2	2	2	2	8
OG2_2037	16	2	2	2	2	2	2	2	2	8
OG2_2038	16	2	2	2	2	2	2	2	2	8
OG2_2039	16	2	2	2	2	2	2	2	2	8
OG2_2040	16	2	2	2	2	2	1	3	2	8
OG2_2041	16	2	2	2	2	2	2	2	2	8
OG2_2042	16	2	2	2	2	2	2	2	2	8
OG2_2043	16	2	2	2	2	2	2	2	2	8
OG2_2044	16	2	2	2	2	2	2	2	2	8
OG2_2045	16	2	2	2	2	2	2	2	2	8
OG2_2046	16	2	2	2	2	2	2	2	2	8
OG2_2047	16	2	2	2	2	2	2	2	2	8
OG2_2048	16	2	2	2	2	2	2	2	2	8
OG2_2049	16	2	2	2	2	2	2	2	2	8
OG2_2050	16	2	2	2	2	2	2	2	2	8
OG2_2051	16	2	2	2	2	2	2	2	2	8
OG2_2052	16	2	2	2	2	2	2	2	2	8
OG2_2053	16	2	2	2	2	2	2	2	2	8
OG2_2054	16	2	2	2	2	2	2	2	2	8
OG2_2055	16	2	2	2	2	2	2	2	2	8
OG2_2056	16	2	2	2	2	2	2	2	2	8
OG2_2057	16	2	2	2	2	2	2	2	2	8
OG2_2058	16	2	2	2	2	2	2	2	2	8
OG2_2059	16	2	2	2	2	2	2	2	2	8
OG2_2060	16	2	2	2	2	2	2	2	2	8
OG2_2061	16	2	2	2	2	2	2	2	2	8
OG2_2062	16	2	2	2	2	2	2	2	2	8
OG2_2063	16	2	2	2	2	2	2	2	2	8
OG2_2064	16	2	2	2	2	2	2	2	2	8
OG2_2065	16	2	2	2	2	2	2	2	2	8
OG2_2066	16	2	2	2	2	2	2	2	2	8
OG2_2067	16	2	2	2	2	2	2	2	2	8
OG2_2068	16	2	2	2	2	2	2	2	2	8
OG2_2069	16	2	2	2	2	2	2	2	2	8
OG2_2070	16	2	2	2	2	2	2	2	2	8
OG2_2071	16	2	2	2	2	2	2	2	2	8
OG2_2072	16	3	2	2	2	2	0	3	2	7
OG2_2073	16	3	2	2	2	2	1	2	2	8
OG2_2074	16	2	2	2	2	2	2	2	2	8
OG2_2075	16	2	2	2	2	2	2	2	2	8
OG2_2076	16	2	2	2	2	2	2	2	2	8
OG2_2077	16	2	2	2	2	2	2	2	2	8
OG2_2078	16	2	2	2	2	2	2	2	2	8
OG2_2079	16	2	2	2	2	2	2	2	2	8
OG2_2080	16	2	2	2	2	2	2	2	2	8
OG2_2081	16	2	2	2	2	2	2	2	2	8
OG2_2082	16	2	2	2	2	2	2	2	2	8
OG2_2083	16	2	2	2	2	2	2	2	2	8
OG2_2084	16	2	2	2	2	2	2	2	2	8
OG2_2085	16	2	2	2	2	2	2	2	2	8
OG2_2086	16	2	2	1	3	2	2	2	2	8
OG2_2087	16	2	2	2	2	2	2	2	2	8
OG2_2088	16	2	2	2	2	2	2	2	2	8
OG2_2089	16	2	2	2	2	2	2	2	2	8
OG2_2090	16	2	2	2	2	2	2	2	2	8
OG2_2091	16	2	2	2	2	2	2	2	2	8
OG2_2092	16	2	2	2	2	2	2	2	2	8
OG2_2093	16	2	2	2	2	2	2	2	2	8
OG2_2094	16	2	2	2	2	2	2	2	2	8
OG2_2095	16	2	2	2	1	2	2	2	3	8
OG2_2096	16	2	2	2	2	2	2	2	2	8
OG2_2097	16	2	2	2	2	2	2	2	2	8
OG2_2098	16	2	2	3	2	2	1	2	2	8
OG2_2099	16	2	2	2	2	2	2	2	2	8
OG2_2100	16	2	2	2	2	2	2	2	2	8
OG2_2101	16	2	2	2	2	2	2	2	2	8
OG2_2102	16	2	2	2	2	2	2	2	2	8
OG2_2103	16	2	2	2	2	2	2	2	2	8
OG2_2104	16	2	2	2	2	2	2	2	2	8
OG2_2105	16	2	2	2	2	2	2	2	2	8
OG2_2106	16	2	2	2	2	2	2	2	2	8
OG2_2107	16	2	2	2	2	2	2	2	2	8
OG2_2108	16	2	2	2	2	2	2	2	2	8
OG2_2109	16	2	2	2	2	2	2	2	2	8
OG2_2110	16	2	2	2	2	2	2	2	2	8
OG2_2111	16	2	2	2	2	2	2	2	2	8
OG2_2112	16	2	2	2	2	2	2	2	2	8
OG2_2113	16	2	2	2	2	2	2	2	2	8
OG2_2114	16	2	2	2	2	2	2	2	2	8
OG2_2115	16	2	2	2	2	2	2	2	2	8
OG2_2116	16	2	2	2	2	2	2	2	2	8
OG2_2117	16	2	2	2	2	2	2	2	2	8
OG2_2118	16	2	2	2	2	2	2	2	2	8
OG2_2119	16	2	2	2	2	2	2	2	2	8
OG2_2120	16	2	2	2	2	2	2	2	2	8
OG2_2121	16	2	2	2	2	2	2	2	2	8
OG2_2122	16	2	2	2	2	2	2	2	2	8
OG2_2123	16	2	2	2	2	2	2	2	2	8
OG2_2124	16	2	2	2	2	2	2	2	2	8
OG2_2125	16	2	2	2	2	2	2	2	2	8
OG2_2126	16	2	2	2	2	2	2	2	2	8
OG2_2127	16	2	2	2	2	2	2	2	2	8
OG2_2128	16	2	2	2	2	2	2	2	2	8
OG2_2129	16	2	2	1	2	2	2	2	3	8
OG2_2130	16	1	2	1	3	2	2	2	3	8
OG2_2131	16	2	2	2	2	2	2	2	2	8
OG2_2132	16	2	2	2	2	2	2	2	2	8
OG2_2133	16	2	2	2	2	2	2	2	2	8
OG2_2134	16	2	2	2	2	2	2	2	2	8
OG2_2135	16	2	2	2	2	2	2	2	2	8
OG2_2136	16	2	2	2	2	2	2	2	2	8
OG2_2137	16	2	2	2	2	2	2	2	2	8
OG2_2138	16	2	2	2	2	2	2	2	2	8
OG2_2139	16	2	2	2	2	2	2	2	2	8
OG2_2140	16	2	2	2	2	2	2	2	2	8
OG2_2141	16	1	2	2	2	2	2	3	2	8
OG2_2142	16	2	2	2	2	2	2	2	2	8
OG2_2143	16	2	2	2	2	2	2	2	2	8
OG2_2144	16	2	2	2	2	2	2	2	2	8
OG2_2145	16	2	2	2	2	2	2	2	2	8
OG2_2146	16	2	2	2	2	2	2	2	2	8
OG2_2147	16	2	2	2	2	2	2	2	2	8
OG2_2148	16	2	2	2	2	2	2	2	2	8
OG2_2149	16	2	2	2	2	2	2	2	2	8
OG2_2150	16	2	2	2	2	2	2	2	2	8
OG2_2151	16	2	2	2	2	2	2	2	2	8
OG2_2152	16	2	2	2	2	2	2	2	2	8
OG2_2153	16	2	2	2	2	2	2	2	2	8
OG2_2154	16	2	2	2	1	2	2	2	3	8
OG2_2155	16	2	2	2	2	2	2	2	2	8
OG2_2156	16	2	3	3	3	3	0	1	1	7
OG2_2157	16	2	2	2	2	2	2	2	2	8
OG2_2158	16	2	2	2	2	2	2	2	2	8
OG2_2159	16	2	2	2	2	2	2	2	2	8
OG2_2160	16	2	2	2	2	2	2	2	2	8
OG2_2161	16	2	2	2	2	2	2	2	2	8
OG2_2162	16	2	2	2	2	2	2	2	2	8
OG2_2163	16	2	2	2	2	2	2	2	2	8
OG2_2164	16	2	2	2	2	2	2	2	2	8
OG2_2165	16	2	2	2	2	2	2	2	2	8
OG2_2166	16	2	2	2	2	2	2	2	2	8
OG2_2167	16	2	2	2	2	2	2	2	2	8
OG2_2168	16	2	2	2	2	2	2	2	2	8
OG2_2169	16	2	2	2	2	2	2	2	2	8
OG2_2170	16	2	2	2	2	2	2	2	2	8
OG2_2171	16	2	2	2	2	2	2	2	2	8
OG2_2172	16	2	2	2	2	2	2	2	2	8
OG2_2173	16	2	2	2	2	2	2	2	2	8
OG2_2174	16	2	2	2	2	2	3	1	2	8
OG2_2175	16	2	2	2	2	2	2	2	2	8
OG2_2176	16	2	2	2	2	2	2	2	2	8
OG2_2177	16	2	2	2	2	2	2	2	2	8
OG2_2178	16	2	2	2	2	2	2	2	2	8
OG2_2179	16	2	2	2	2	2	2	2	2	8
OG2_2180	16	2	2	2	2	2	1	3	2	8
OG2_2181	16	2	2	2	3	2	1	2	2	8
OG2_2182	16	2	2	2	2	2	2	2	2	8
OG2_2183	16	2	2	2	2	2	2	2	2	8
OG2_2184	16	2	2	2	2	2	2	2	2	8
OG2_2185	16	2	2	2	2	2	2	2	2	8
OG2_2186	16	2	2	1	3	2	4	2	0	7
OG2_2187	16	2	4	1	3	3	1	1	1	8
OG2_2188	16	2	2	2	2	2	2	2	2	8
OG2_2189	16	2	2	2	2	2	2	2	2	8
OG2_2190	16	2	2	2	2	2	2	2	2	8
OG2_2191	16	2	2	2	1	4	1	1	3	8
OG2_2192	16	2	2	2	2	2	2	2	2	8
OG2_2193	16	2	2	2	2	2	2	2	2	8
OG2_2194	16	2	2	2	2	2	2	2	2	8
OG2_2195	16	2	2	2	2	2	2	2	2	8
OG2_2196	16	2	2	2	2	3	1	2	2	8
OG2_2197	16	2	2	2	2	2	2	2	2	8
OG2_2198	16	2	2	2	2	2	2	2	2	8
OG2_2199	16	2	2	2	2	2	2	2	2	8
OG2_2200	16	2	2	2	2	2	2	2	2	8
OG2_2201	16	2	2	2	2	2	2	2	2	8
OG2_2202	16	2	2	2	2	2	2	2	2	8
OG2_2203	16	2	2	2	2	2	2	2	2	8
OG2_2204	16	2	2	2	2	2	2	2	2	8
OG2_2205	16	2	2	2	2	2	2	2	2	8
OG2_2206	16	2	2	2	2	2	2	2	2	8
OG2_2207	16	2	2	2	2	2	2	2	2	8
OG2_2208	16	2	2	2	2	2	2	2	2	8
OG2_2209	16	2	2	2	2	2	2	2	2	8
OG2_2210	16	2	2	2	2	2	2	2	2	8
OG2_2211	16	3	3	2	3	2	0	1	2	7
OG2_2212	16	2	2	2	2	2	2	2	2	8
OG2_2213	16	2	2	2	2	2	2	2	2	8
OG2_2214	16	2	2	2	2	2	2	2	2	8
OG2_2215	16	2	2	2	2	2	2	2	2	8
OG2_2216	16	2	2	2	2	2	2	2	2	8
OG2_2217	16	2	2	2	2	2	2	2	2	8
OG2_2218	16	2	2	2	2	2	2	2	2	8
OG2_2219	16	2	2	2	2	2	2	2	2	8
OG2_2220	16	2	2	2	2	2	2	2	2	8
OG2_2221	16	2	2	2	2	2	2	2	2	8
OG2_2222	16	2	2	2	2	2	2	2	2	8
OG2_2223	16	2	5	0	0	4	1	0	4	5
OG2_2224	16	2	2	2	2	2	2	2	2	8
OG2_2225	16	2	2	2	2	2	2	2	2	8
OG2_2226	16	2	2	2	2	2	2	2	2	8
OG2_2227	16	2	2	2	2	2	2	2	2	8
OG2_2228	16	2	2	2	2	2	2	2	2	8
OG2_2229	16	2	2	2	2	2	2	2	2	8
OG2_2230	16	2	2	2	2	2	2	2	2	8
OG2_2231	16	2	2	2	2	2	2	2	2	8
OG2_2232	16	2	2	2	2	2	2	2	2	8
OG2_2233	16	2	2	2	2	2	2	2	2	8
OG2_2234	16	2	2	2	2	2	2	2	2	8
OG2_2235	16	2	2	2	2	2	2	2	2	8
OG2_2236	16	2	2	2	2	2	2	2	2	8
OG2_2237	16	2	2	2	2	2	2	2	2	8
OG2_2238	16	2	2	2	2	2	2	2	2	8
OG2_2239	16	2	2	2	2	2	2	2	2	8
OG2_2240	16	3	3	1	2	3	1	1	2	8
OG2_2241	16	2	2	2	2	2	1	2	3	8
OG2_2242	16	1	0	0	3	2	4	2	4	6
OG2_2243	16	2	2	2	2	2	2	2	2	8
OG2_2244	16	2	2	2	2	2	2	2	2	8
OG2_2245	16	2	1	1	2	2	2	3	3	8
OG2_2246	16	2	2	2	2	2	2	2	2	8
OG2_2247	16	2	2	2	3	2	2	1	2	8
OG2_2248	16	2	2	2	2	2	2	2	2	8
OG2_2249	16	2	2	2	2	2	2	2	2	8
OG2_2250	16	2	2	2	2	2	2	2	2	8
OG2_2251	16	2	2	2	2	2	2	2	2	8
OG2_2252	16	2	2	2	2	2	2	2	2	8
OG2_2253	16	1	1	1	9	1	1	1	1	8
OG2_2254	16	2	2	2	2	2	2	2	2	8
OG2_2255	16	2	2	2	2	2	2	2	2	8
OG2_2256	16	2	2	2	2	2	2	2	2	8
OG2_2257	16	2	2	2	2	2	2	2	2	8
OG2_2258	16	2	3	2	2	3	1	1	2	8
OG2_2259	16	2	2	2	2	2	2	2	2	8
OG2_2260	16	2	2	2	3	2	2	1	2	8
OG2_2261	16	2	2	2	2	2	2	2	2	8
OG2_2262	16	2	2	2	2	2	1	3	2	8
OG2_2263	16	2	0	0	3	0	2	3	6	5
OG2_2264	16	2	2	2	2	2	2	2	2	8
OG2_2265	16	3	2	3	2	1	4	1	0	7
OG2_2266	16	3	3	2	3	1	1	0	3	7
OG2_2267	16	3	1	1	3	1	3	1	3	8
OG2_2268	16	3	2	2	2	2	1	2	2	8
OG2_2269	16	2	2	2	2	2	2	2	2	8
OG2_2270	16	2	2	2	2	2	2	2	2	8
OG2_2271	16	1	1	1	5	1	1	1	5	8
OG2_2272	16	2	2	2	2	2	2	2	2	8
OG2_2273	16	2	2	2	2	2	2	2	2	8
OG2_2274	16	2	2	2	2	2	2	2	2	8
OG2_2275	16	2	2	2	2	2	2	2	2	8
OG2_2276	16	2	2	1	2	2	2	2	3	8
OG2_2277	16	2	2	2	2	2	2	2	2	8
OG2_2278	16	1	1	1	1	1	1	1	9	8
OG2_2279	16	2	2	2	2	2	2	2	2	8
OG2_2280	16	2	2	2	2	2	1	2	3	8
OG2_2281	16	2	2	2	2	2	2	1	3	8
OG2_2282	16	2	2	2	2	2	2	2	2	8
OG2_2283	16	2	2	2	2	2	2	2	2	8
OG2_2284	16	2	2	2	1	1	5	1	2	8
OG2_2285	16	2	0	0	1	1	1	2	9	6
OG2_2286	16	1	1	1	0	1	1	1	10	7
OG2_2287	16	2	2	2	2	2	2	2	2	8
OG2_2288	16	2	2	2	2	2	2	2	2	8
OG2_2289	16	2	2	2	2	2	2	2	2	8
OG2_2290	16	2	1	1	2	1	4	4	1	8
OG2_2291	16	2	2	2	2	2	2	2	2	8
OG2_2292	16	2	2	2	2	2	1	3	2	8
OG2_2293	16	2	3	3	2	2	0	2	2	7
OG2_2294	16	2	2	2	2	2	2	2	2	8
OG2_2295	16	2	2	2	2	2	2	2	2	8
OG2_2296	16	2	2	2	2	2	2	2	2	8
OG2_2297	16	2	2	2	2	2	2	2	2	8
OG2_2298	16	2	2	2	2	2	2	2	2	8
OG2_2299	16	2	2	2	2	2	2	2	2	8
OG2_2300	16	2	2	2	2	2	2	2	2	8
OG2_2301	16	2	2	2	2	2	2	2	2	8
OG2_2302	16	2	2	2	2	2	2	2	2	8
OG2_2303	16	2	2	2	2	2	2	2	2	8
OG2_2304	16	2	2	2	2	2	2	2	2	8
OG2_2305	16	2	2	2	2	2	2	2	2	8
OG2_2306	16	2	2	2	2	2	2	2	2	8
OG2_2307	16	2	2	2	2	2	2	2	2	8
OG2_2308	16	2	2	2	2	2	2	2	2	8
OG2_2309	16	2	2	2	2	2	2	2	2	8
OG2_2310	16	2	2	2	2	2	2	2	2	8
OG2_2311	16	2	2	2	2	2	2	2	2	8
OG2_2312	16	2	2	2	2	2	2	2	2	8
OG2_2313	16	2	2	2	2	2	2	2	2	8
OG2_2314	16	2	2	2	2	2	2	2	2	8
OG2_2315	16	2	2	2	2	2	2	2	2	8
OG2_2316	16	2	2	2	2	2	2	2	2	8
OG2_2317	16	2	2	2	2	2	2	2	2	8
OG2_2318	16	2	2	3	2	2	1	2	2	8
OG2_2319	16	2	2	2	2	2	2	2	2	8
OG2_2320	16	2	2	2	2	2	2	2	2	8
OG2_2321	16	2	2	2	2	2	2	2	2	8
OG2_2322	16	2	2	2	2	2	2	2	2	8
OG2_2323	16	2	2	2	2	2	2	2	2	8
OG2_2324	16	2	2	2	2	2	2	2	2	8
OG2_2325	16	2	2	2	2	2	2	2	2	8
OG2_2326	16	2	2	2	2	2	2	2	2	8
OG2_2327	16	2	2	2	2	2	1	3	2	8
OG2_2328	16	2	2	2	2	2	2	2	2	8
OG2_2329	16	2	2	2	2	2	2	2	2	8
OG2_2330	16	0	0	0	0	0	0	16	0	1
OG2_2331	16	2	2	2	2	2	2	2	2	8
OG2_2332	16	2	2	2	2	2	2	2	2	8
OG2_2333	16	2	2	2	2	2	2	2	2	8
OG2_2334	16	2	2	2	2	2	2	2	2	8
OG2_2335	16	2	2	2	2	2	2	2	2	8
OG2_2336	16	0	0	0	0	0	0	16	0	1
OG2_2337	16	2	2	2	2	2	2	2	2	8
OG2_2338	16	2	2	2	2	2	2	2	2	8
OG2_2339	16	2	2	2	2	2	2	2	2	8
OG2_2340	16	2	2	2	2	2	2	2	2	8
OG2_2341	16	2	2	2	2	2	2	2	2	8
OG2_2342	16	2	2	2	2	2	2	2	2	8
OG2_2343	16	2	2	2	2	2	2	2	2	8
OG2_2344	16	2	2	2	2	2	2	2	2	8
OG2_2345	16	2	2	2	2	2	2	2	2	8
OG2_2346	16	2	2	2	2	2	2	2	2	8
OG2_2347	16	2	2	2	2	2	2	2	2	8
OG2_2348	16	2	2	2	2	2	2	2	2	8
OG2_2349	16	2	2	2	2	2	2	2	2	8
OG2_2350	16	2	2	2	2	2	2	2	2	8
OG2_2351	16	2	2	2	2	2	2	2	2	8
OG2_2352	16	2	2	2	2	2	2	2	2	8
OG2_2353	16	2	2	2	2	2	2	2	2	8
OG2_2354	16	2	2	2	2	2	2	2	2	8
OG2_2355	16	2	2	2	2	2	2	2	2	8
OG2_2356	16	2	2	2	2	2	2	2	2	8
OG2_2357	16	2	2	2	2	2	2	2	2	8
OG2_2358	16	2	2	2	2	2	2	2	2	8
OG2_2359	16	2	2	2	2	2	2	2	2	8
OG2_2360	16	2	2	2	2	2	2	2	2	8
OG2_2361	16	2	2	2	2	2	2	2	2	8
OG2_2362	16	2	2	2	2	2	2	2	2	8
OG2_2363	16	2	2	2	2	2	2	2	2	8
OG2_2364	16	2	2	2	2	2	2	2	2	8
OG2_2365	16	2	2	2	2	2	2	2	2	8
OG2_2366	16	2	2	2	2	2	2	2	2	8
OG2_2367	16	2	2	2	2	2	2	2	2	8
OG2_2368	16	2	2	2	2	2	2	2	2	8
OG2_2369	16	2	2	2	2	2	2	2	2	8
OG2_2370	16	2	2	2	2	2	2	2	2	8
OG2_2371	16	2	2	2	2	2	2	2	2	8
OG2_2372	16	2	2	2	2	2	2	2	2	8
OG2_2373	16	2	2	2	2	2	2	2	2	8
OG2_2374	16	2	2	2	2	2	2	2	2	8
OG2_2375	16	2	2	2	2	2	2	2	2	8
OG2_2376	16	2	2	2	2	2	2	2	2	8
OG2_2377	16	2	2	2	2	2	2	2	2	8
OG2_2378	16	2	2	2	2	2	2	2	2	8
OG2_2379	16	2	1	2	2	2	2	3	2	8
OG2_2380	16	2	2	2	2	2	2	2	2	8
OG2_2381	16	2	2	2	2	2	2	2	2	8
OG2_2382	16	2	2	2	2	2	2	2	2	8
OG2_2383	16	2	2	2	2	2	2	2	2	8
OG2_2384	16	2	2	2	2	2	2	2	2	8
OG2_2385	16	2	2	2	2	2	2	2	2	8
OG2_2386	16	2	2	2	2	2	2	2	2	8
OG2_2387	16	2	2	2	2	2	2	2	2	8
OG2_2388	16	2	2	2	2	2	2	2	2	8
OG2_2389	16	2	2	2	2	2	1	2	3	8
OG2_2390	16	2	2	2	2	2	2	2	2	8
OG2_2391	16	2	2	2	2	2	2	2	2	8
OG2_2392	16	2	2	2	2	2	2	2	2	8
OG2_2393	16	2	2	2	2	2	2	2	2	8
OG2_2394	16	2	2	2	2	2	2	2	2	8
OG2_2395	16	2	2	2	2	2	1	3	2	8
OG2_2396	16	2	2	2	2	2	2	2	2	8
OG2_2397	16	2	2	2	2	2	2	2	2	8
OG2_2398	16	2	2	2	2	2	2	2	2	8
OG2_2399	16	2	2	2	2	2	2	2	2	8
OG2_2400	16	2	2	2	2	2	2	2	2	8
OG2_2401	16	2	2	2	2	2	1	3	2	8
OG2_2402	16	2	2	2	2	2	2	2	2	8
OG2_2403	16	2	2	2	2	2	1	3	2	8
OG2_2404	16	2	2	2	2	2	2	2	2	8
OG2_2405	16	2	2	2	2	2	2	2	2	8
OG2_2406	16	2	2	2	2	2	2	2	2	8
OG2_2407	16	2	2	2	2	2	2	2	2	8
OG2_2408	16	2	2	2	2	2	2	2	2	8
OG2_2409	16	2	2	2	2	2	2	2	2	8
OG2_2410	16	2	2	2	2	2	2	2	2	8
OG2_2411	16	2	2	2	2	2	2	2	2	8
OG2_2412	16	2	2	2	2	2	2	2	2	8
OG2_2413	16	2	2	2	2	2	2	2	2	8
OG2_2414	16	2	2	2	2	2	2	2	2	8
OG2_2415	16	2	2	2	2	2	2	2	2	8
OG2_2416	16	2	2	2	2	2	2	2	2	8
OG2_2417	16	2	2	2	2	2	2	2	2	8
OG2_2418	16	2	2	2	2	2	2	2	2	8
OG2_2419	16	2	2	2	2	2	2	2	2	8
OG2_2420	16	2	2	2	2	2	2	2	2	8
OG2_2421	16	2	2	2	2	2	2	2	2	8
OG2_2422	16	2	2	2	2	2	2	2	2	8
OG2_2423	16	2	2	2	2	2	2	2	2	8
OG2_2424	16	2	2	2	2	2	2	2	2	8
OG2_2425	16	2	2	2	2	2	2	2	2	8
OG2_2426	16	2	2	2	2	2	2	2	2	8
OG2_2427	16	2	2	2	2	2	2	2	2	8
OG2_2428	16	0	0	0	0	0	0	16	0	1
OG2_2429	16	2	2	2	2	2	2	2	2	8
OG2_2430	16	2	2	2	2	2	2	2	2	8
OG2_2431	16	2	2	2	2	2	2	2	2	8
OG2_2432	16	2	2	2	2	2	2	2	2	8
OG2_2433	16	2	2	2	2	2	1	3	2	8
OG2_2434	16	2	2	2	2	2	2	2	2	8
OG2_2435	16	2	2	2	2	2	2	2	2	8
OG2_2436	16	2	2	2	2	2	2	2	2	8
OG2_2437	16	2	2	2	2	2	2	2	2	8
OG2_2438	16	2	2	2	2	2	2	2	2	8
OG2_2439	16	1	5	1	1	0	6	1	1	7
OG2_2440	16	2	2	2	2	2	2	2	2	8
OG2_2441	16	2	2	2	2	2	2	2	2	8
OG2_2442	16	2	2	2	2	2	2	2	2	8
OG2_2443	16	2	2	2	2	2	2	2	2	8
OG2_2444	16	2	2	2	2	2	2	2	2	8
OG2_2445	16	2	2	2	2	2	2	2	2	8
OG2_2446	16	2	2	2	2	2	2	2	2	8
OG2_2447	16	2	2	2	2	2	2	2	2	8
OG2_2448	16	2	2	2	2	2	3	1	2	8
OG2_2449	16	2	2	2	2	2	2	2	2	8
OG2_2450	16	2	2	2	2	2	2	2	2	8
OG2_2451	16	2	2	2	2	2	2	2	2	8
OG2_2452	16	2	2	2	2	2	2	2	2	8
OG2_2453	16	2	2	2	2	2	2	2	2	8
OG2_2454	16	2	2	2	2	2	2	2	2	8
OG2_2455	16	2	2	2	2	2	2	2	2	8
OG2_2456	16	2	2	2	2	2	2	2	2	8
OG2_2457	16	2	2	2	2	2	2	2	2	8
OG2_2458	16	2	2	2	2	2	2	2	2	8
OG2_2459	16	2	2	2	2	2	2	2	2	8
OG2_2460	16	2	2	2	2	2	2	2	2	8
OG2_2461	16	2	2	2	2	2	2	2	2	8
OG2_2462	15	2	2	1	2	2	1	2	3	8
OG2_2463	15	2	2	2	2	2	1	2	2	8
OG2_2464	15	2	2	1	2	2	2	2	2	8
OG2_2465	15	2	0	3	3	3	0	2	2	6
OG2_2466	15	2	2	2	2	2	1	2	2	8
OG2_2467	15	2	2	2	2	2	1	2	2	8
OG2_2468	15	2	2	2	2	2	1	2	2	8
OG2_2469	15	2	2	2	2	2	1	2	2	8
OG2_2470	15	2	2	2	2	2	2	1	2	8
OG2_2471	15	1	2	2	2	2	2	2	2	8
OG2_2472	15	2	2	2	2	2	1	2	2	8
OG2_2473	15	2	2	2	2	2	1	2	2	8
OG2_2474	15	2	2	2	2	2	1	2	2	8
OG2_2475	15	2	2	2	2	2	1	2	2	8
OG2_2476	15	2	2	2	2	2	1	2	2	8
OG2_2477	15	2	2	2	1	2	2	2	2	8
OG2_2478	15	1	2	2	2	2	2	2	2	8
OG2_2479	15	2	2	1	2	2	2	2	2	8
OG2_2480	15	2	2	2	3	2	2	1	1	8
OG2_2481	15	2	2	1	2	2	2	2	2	8
OG2_2482	15	2	2	2	2	2	1	2	2	8
OG2_2483	15	2	2	2	2	2	1	2	2	8
OG2_2484	15	2	2	2	2	2	1	2	2	8
OG2_2485	15	2	2	2	2	2	1	2	2	8
OG2_2486	15	2	2	2	2	2	2	1	2	8
OG2_2487	15	2	2	2	2	2	1	2	2	8
OG2_2488	15	2	1	2	2	2	2	2	2	8
OG2_2489	15	2	2	1	2	2	1	3	2	8
OG2_2490	15	2	2	2	2	2	1	2	2	8
OG2_2491	15	1	2	2	2	2	4	1	1	8
OG2_2492	15	2	2	2	2	2	1	2	2	8
OG2_2493	15	2	2	1	2	2	2	2	2	8
OG2_2494	15	2	2	2	2	2	1	2	2	8
OG2_2495	15	2	2	2	2	2	1	2	2	8
OG2_2496	15	2	1	1	2	2	2	3	2	8
OG2_2497	15	2	2	1	2	2	2	2	2	8
OG2_2498	15	1	2	2	2	2	2	2	2	8
OG2_2499	15	2	2	2	2	2	1	2	2	8
OG2_2500	15	2	2	2	2	2	2	1	2	8
OG2_2501	15	2	2	2	2	2	1	2	2	8
OG2_2502	15	2	2	2	2	2	1	2	2	8
OG2_2503	15	2	2	2	2	2	1	2	2	8
OG2_2504	15	2	2	2	2	2	1	2	2	8
OG2_2505	15	2	2	2	2	2	1	2	2	8
OG2_2506	15	2	2	2	2	2	2	1	2	8
OG2_2507	15	2	2	2	2	2	2	1	2	8
OG2_2508	15	2	2	2	2	2	2	1	2	8
OG2_2509	15	2	2	2	2	2	1	2	2	8
OG2_2510	15	2	2	2	2	2	1	2	2	8
OG2_2511	15	2	2	1	2	2	2	2	2	8
OG2_2512	15	2	2	2	2	2	1	2	2	8
OG2_2513	15	2	2	2	2	2	1	2	2	8
OG2_2514	15	2	2	1	2	2	2	2	2	8
OG2_2515	15	2	2	1	2	2	2	2	2	8
OG2_2516	15	2	2	2	2	2	1	2	2	8
OG2_2517	15	2	2	1	2	2	2	2	2	8
OG2_2518	15	2	2	1	3	2	1	2	2	8
OG2_2519	15	2	2	2	2	2	1	2	2	8
OG2_2520	15	2	2	1	2	2	2	2	2	8
OG2_2521	15	2	2	1	2	2	2	2	2	8
OG2_2522	15	2	2	2	2	3	2	0	2	7
OG2_2523	15	1	2	2	2	2	1	3	2	8
OG2_2524	15	2	2	2	2	2	1	2	2	8
OG2_2525	15	2	2	1	2	2	1	3	2	8
OG2_2526	15	2	2	1	2	2	2	2	2	8
OG2_2527	15	2	2	2	2	2	1	2	2	8
OG2_2528	15	2	2	2	2	2	1	2	2	8
OG2_2529	15	2	2	2	2	2	2	1	2	8
OG2_2530	15	2	1	2	2	2	2	2	2	8
OG2_2531	15	2	2	2	2	2	1	2	2	8
OG2_2532	15	2	2	2	2	2	1	2	2	8
OG2_2533	15	2	2	1	2	2	2	2	2	8
OG2_2534	15	3	2	1	3	2	1	2	1	8
OG2_2535	15	2	2	2	2	2	1	2	2	8
OG2_2536	15	2	2	1	3	2	1	2	2	8
OG2_2537	15	2	2	1	2	2	2	2	2	8
OG2_2538	15	2	2	2	4	2	1	2	0	7
OG2_2539	15	2	1	2	2	2	2	2	2	8
OG2_2540	15	2	3	3	2	3	1	1	0	7
OG2_2541	15	2	2	2	2	2	1	2	2	8
OG2_2542	15	3	2	2	1	2	1	2	2	8
OG2_2543	15	2	2	1	2	2	2	2	2	8
OG2_2544	15	2	2	2	1	2	2	2	2	8
OG2_2545	15	2	2	1	2	2	2	2	2	8
OG2_2546	15	2	2	2	2	2	1	2	2	8
OG2_2547	15	2	2	1	2	2	1	2	3	8
OG2_2548	15	2	2	2	2	2	1	2	2	8
OG2_2549	15	2	2	2	1	2	4	2	0	7
OG2_2550	15	3	3	2	1	2	2	1	1	8
OG2_2551	15	2	2	1	2	2	2	2	2	8
OG2_2552	15	2	2	2	2	2	2	1	2	8
OG2_2553	15	2	2	2	1	2	2	2	2	8
OG2_2554	15	2	2	1	2	2	2	2	2	8
OG2_2555	15	2	2	2	2	2	1	2	2	8
OG2_2556	15	2	2	2	2	2	1	2	2	8
OG2_2557	15	2	2	2	2	2	3	1	1	8
OG2_2558	15	2	2	1	2	2	2	2	2	8
OG2_2559	15	2	2	2	1	2	2	2	2	8
OG2_2560	15	1	2	2	2	2	2	2	2	8
OG2_2561	15	2	2	2	2	2	2	1	2	8
OG2_2562	15	1	2	2	2	2	2	2	2	8
OG2_2563	15	2	2	2	2	2	1	2	2	8
OG2_2564	15	2	2	1	2	2	2	2	2	8
OG2_2565	15	2	2	2	2	2	2	1	2	8
OG2_2566	15	2	2	2	2	2	1	2	2	8
OG2_2567	15	2	2	2	2	2	1	2	2	8
OG2_2568	15	2	2	1	2	2	2	2	2	8
OG2_2569	15	2	2	2	2	2	2	1	2	8
OG2_2570	15	2	2	2	2	2	1	2	2	8
OG2_2571	15	2	2	2	2	2	1	2	2	8
OG2_2572	15	2	2	2	2	2	1	2	2	8
OG2_2573	15	2	2	1	2	2	2	2	2	8
OG2_2574	15	2	1	2	2	2	2	2	2	8
OG2_2575	15	1	1	0	4	3	1	2	3	7
OG2_2576	15	2	2	2	2	2	1	2	2	8
OG2_2577	15	1	4	4	1	2	0	2	1	7
OG2_2578	15	2	2	2	2	2	1	2	2	8
OG2_2579	15	2	2	1	2	2	1	2	3	8
OG2_2580	15	2	2	2	2	2	1	2	2	8
OG2_2581	15	2	2	2	2	2	1	2	2	8
OG2_2582	15	2	2	2	2	2	1	2	2	8
OG2_2583	15	2	2	2	2	2	1	2	2	8
OG2_2584	15	2	2	2	2	2	1	2	2	8
OG2_2585	15	2	2	2	2	2	1	2	2	8
OG2_2586	15	1	1	1	6	1	1	3	1	8
OG2_2587	15	2	2	2	3	2	2	0	2	7
OG2_2588	15	3	1	2	2	2	1	2	2	8
OG2_2589	15	1	2	1	4	1	2	3	1	8
OG2_2590	15	2	2	2	2	1	2	2	2	8
OG2_2591	15	2	1	2	3	2	2	2	1	8
OG2_2592	15	2	3	2	2	2	2	0	2	7
OG2_2593	15	1	2	2	3	2	1	2	2	8
OG2_2594	15	3	2	1	2	1	3	1	2	8
OG2_2595	15	2	1	0	2	0	1	2	7	6
OG2_2596	15	0	1	0	2	1	1	10	0	5
OG2_2597	15	0	0	0	15	0	0	0	0	1
OG2_2598	15	2	1	1	2	1	3	3	2	8
OG2_2599	15	2	2	2	2	1	2	2	2	8
OG2_2600	15	2	2	2	2	2	1	2	2	8
OG2_2601	15	2	1	1	2	2	2	2	3	8
OG2_2602	15	2	2	2	2	2	1	2	2	8
OG2_2603	15	3	2	1	2	2	1	1	3	8
OG2_2604	15	2	2	2	2	2	0	2	3	7
OG2_2605	15	2	2	2	2	2	1	2	2	8
OG2_2606	15	1	2	0	1	1	3	2	5	7
OG2_2607	15	2	2	2	1	2	1	2	3	8
OG2_2608	15	1	1	1	1	2	4	2	3	8
OG2_2609	15	2	2	2	2	2	2	2	1	8
OG2_2610	15	2	2	1	1	2	2	3	2	8
OG2_2611	15	2	2	1	2	2	2	2	2	8
OG2_2612	15	2	2	2	2	2	1	2	2	8
OG2_2613	15	2	2	2	2	2	1	2	2	8
OG2_2614	15	2	2	2	2	2	1	2	2	8
OG2_2615	15	2	2	2	2	2	2	2	1	8
OG2_2616	15	2	2	2	2	2	1	2	2	8
OG2_2617	15	2	2	2	2	1	2	2	2	8
OG2_2618	15	2	2	2	2	2	1	2	2	8
OG2_2619	15	2	2	2	2	1	2	2	2	8
OG2_2620	15	2	2	1	2	2	2	2	2	8
OG2_2621	15	2	2	1	2	2	2	2	2	8
OG2_2622	15	2	2	2	2	2	1	2	2	8
OG2_2623	15	2	2	2	2	1	2	2	2	8
OG2_2624	15	2	2	2	2	2	1	2	2	8
OG2_2625	15	2	2	2	2	2	1	2	2	8
OG2_2626	15	2	2	2	2	1	2	2	2	8
OG2_2627	15	2	2	2	2	2	1	2	2	8
OG2_2628	15	2	2	2	2	2	1	2	2	8
OG2_2629	15	2	2	2	2	2	1	2	2	8
OG2_2630	15	2	2	2	2	2	1	2	2	8
OG2_2631	15	2	1	1	2	2	3	2	2	8
OG2_2632	15	2	2	2	1	2	2	2	2	8
OG2_2633	15	1	2	2	2	2	2	2	2	8
OG2_2634	15	2	3	1	1	2	2	2	2	8
OG2_2635	15	2	2	2	2	2	1	2	2	8
OG2_2636	15	2	2	2	2	2	1	2	2	8
OG2_2637	15	2	2	2	2	2	1	2	2	8
OG2_2638	15	2	2	2	2	2	1	2	2	8
OG2_2639	15	2	2	2	2	2	1	2	2	8
OG2_2640	15	1	2	2	2	2	2	2	2	8
OG2_2641	15	2	2	2	2	2	1	2	2	8
OG2_2642	15	2	2	2	1	2	2	2	2	8
OG2_2643	15	2	2	2	2	2	1	2	2	8
OG2_2644	15	2	2	2	2	2	1	2	2	8
OG2_2645	15	2	2	1	2	2	2	2	2	8
OG2_2646	15	2	2	2	2	2	1	2	2	8
OG2_2647	15	2	1	2	1	2	2	3	2	8
OG2_2648	15	2	2	2	2	2	1	2	2	8
OG2_2649	15	2	2	2	2	2	1	2	2	8
OG2_2650	15	1	2	2	2	2	2	2	2	8
OG2_2651	15	2	2	2	2	2	1	2	2	8
OG2_2652	15	2	2	2	2	1	2	2	2	8
OG2_2653	15	2	2	2	1	2	1	3	2	8
OG2_2654	15	2	2	2	2	1	2	2	2	8
OG2_2655	15	2	2	2	2	2	1	2	2	8
OG2_2656	15	2	2	1	2	2	1	3	2	8
OG2_2657	15	2	2	2	2	2	1	2	2	8
OG2_2658	15	2	2	1	2	2	2	2	2	8
OG2_2659	15	2	2	2	2	2	1	2	2	8
OG2_2660	15	2	2	2	2	2	1	2	2	8
OG2_2661	15	2	2	2	2	2	1	2	2	8
OG2_2662	15	2	2	1	1	2	2	3	2	8
OG2_2663	15	2	2	2	2	2	1	2	2	8
OG2_2664	15	2	2	2	2	2	1	2	2	8
OG2_2665	15	2	2	2	2	2	1	2	2	8
OG2_2666	15	2	2	2	2	1	0	5	1	7
OG2_2667	15	1	2	2	2	2	2	2	2	8
OG2_2668	15	2	2	2	2	2	1	2	2	8
OG2_2669	15	3	1	0	1	2	5	2	1	7
OG2_2670	15	2	1	2	2	2	2	2	2	8
OG2_2671	15	2	2	2	2	2	1	2	2	8
OG2_2672	15	2	2	2	2	2	2	1	2	8
OG2_2673	15	2	2	2	2	1	2	2	2	8
OG2_2674	15	2	2	2	2	2	2	1	2	8
OG2_2675	15	2	2	2	2	1	2	2	2	8
OG2_2676	15	1	2	2	1	1	6	1	1	8
OG2_2677	15	2	2	2	2	2	2	2	1	8
OG2_2678	15	2	2	2	2	1	2	2	2	8
OG2_2679	15	2	2	2	2	2	2	1	2	8
OG2_2680	15	2	2	2	2	2	2	1	2	8
OG2_2681	15	2	2	2	2	2	2	1	2	8
OG2_2682	15	2	2	2	2	2	2	1	2	8
OG2_2683	15	2	2	2	2	2	2	1	2	8
OG2_2684	15	2	2	2	2	2	2	1	2	8
OG2_2685	15	2	2	2	2	2	1	2	2	8
OG2_2686	15	2	2	1	2	2	2	2	2	8
OG2_2687	15	2	2	1	2	2	2	2	2	8
OG2_2688	15	2	2	2	2	2	1	2	2	8
OG2_2689	15	2	2	2	2	2	1	2	2	8
OG2_2690	15	2	2	2	2	2	2	1	2	8
OG2_2691	15	2	2	2	2	2	2	1	2	8
OG2_2692	15	2	2	2	2	2	2	1	2	8
OG2_2693	15	2	2	2	2	2	2	1	2	8
OG2_2694	15	2	2	2	2	2	2	1	2	8
OG2_2695	15	2	2	2	2	2	2	1	2	8
OG2_2696	15	2	2	2	2	2	2	1	2	8
OG2_2697	15	2	2	2	2	2	2	1	2	8
OG2_2698	15	2	2	2	2	2	2	1	2	8
OG2_2699	15	2	2	2	2	2	2	1	2	8
OG2_2700	15	2	2	2	2	2	2	1	2	8
OG2_2701	15	2	2	2	2	2	2	1	2	8
OG2_2702	15	2	2	2	2	2	2	1	2	8
OG2_2703	15	2	2	2	2	2	2	1	2	8
OG2_2704	15	2	2	2	2	2	2	1	2	8
OG2_2705	15	2	2	2	2	2	2	1	2	8
OG2_2706	15	2	2	2	2	2	2	1	2	8
OG2_2707	15	2	2	2	2	2	2	1	2	8
OG2_2708	15	2	2	2	2	2	2	1	2	8
OG2_2709	15	2	2	2	2	2	2	1	2	8
OG2_2710	15	2	2	2	2	2	2	1	2	8
OG2_2711	14	2	2	1	2	2	1	2	2	8
OG2_2712	14	2	2	2	1	2	1	2	2	8
OG2_2713	14	2	2	1	2	2	1	2	2	8
OG2_2714	14	1	2	2	2	2	1	2	2	8
OG2_2715	14	2	2	2	2	2	1	1	2	8
OG2_2716	14	2	2	1	2	2	1	2	2	8
OG2_2717	14	1	3	1	2	3	1	2	1	8
OG2_2718	14	2	2	1	2	2	1	2	2	8
OG2_2719	14	2	2	1	2	2	1	2	2	8
OG2_2720	14	2	1	2	2	2	1	2	2	8
OG2_2721	14	2	2	1	2	2	1	2	2	8
OG2_2722	14	2	2	1	2	2	1	2	2	8
OG2_2723	14	1	2	1	1	2	3	2	2	8
OG2_2724	14	2	2	1	2	2	1	2	2	8
OG2_2725	14	2	2	1	2	2	1	2	2	8
OG2_2726	14	1	2	2	1	2	4	1	1	8
OG2_2727	14	1	3	3	1	3	1	1	1	8
OG2_2728	14	2	2	1	2	2	2	1	2	8
OG2_2729	14	2	2	2	1	2	2	1	2	8
OG2_2730	14	2	2	1	2	2	1	2	2	8
OG2_2731	14	1	2	2	2	2	2	2	1	8
OG2_2732	14	2	2	1	2	2	1	2	2	8
OG2_2733	14	2	2	2	1	2	1	2	2	8
OG2_2734	14	2	2	2	2	2	1	1	2	8
OG2_2735	14	2	2	1	2	2	1	2	2	8
OG2_2736	14	2	2	2	1	2	2	1	2	8
OG2_2737	14	2	2	1	2	2	1	2	2	8
OG2_2738	14	2	2	1	2	2	1	2	2	8
OG2_2739	14	1	2	1	2	3	3	1	1	8
OG2_2740	14	2	2	1	2	2	1	2	2	8
OG2_2741	14	2	2	1	2	2	1	2	2	8
OG2_2742	14	2	2	1	2	2	1	2	2	8
OG2_2743	14	1	2	2	2	2	1	2	2	8
OG2_2744	14	1	0	0	3	2	6	0	2	5
OG2_2745	14	1	1	1	1	2	4	2	2	8
OG2_2746	14	2	1	1	2	2	1	3	2	8
OG2_2747	14	2	2	2	2	2	0	2	2	7
OG2_2748	14	2	2	2	2	2	0	2	2	7
OG2_2749	14	2	2	1	2	2	1	2	2	8
OG2_2750	14	2	2	1	1	2	2	2	2	8
OG2_2751	14	2	2	1	2	2	1	2	2	8
OG2_2752	14	2	2	1	2	2	1	2	2	8
OG2_2753	14	2	2	1	2	2	1	2	2	8
OG2_2754	14	2	2	1	2	2	1	2	2	8
OG2_2755	14	2	2	2	2	2	1	1	2	8
OG2_2756	14	2	2	1	2	2	1	2	2	8
OG2_2757	14	2	2	1	2	2	1	2	2	8
OG2_2758	14	2	2	1	2	2	1	2	2	8
OG2_2759	14	2	2	2	2	2	1	1	2	8
OG2_2760	14	1	2	2	4	2	0	1	2	7
OG2_2761	14	2	3	1	2	2	0	2	2	7
OG2_2762	14	2	2	2	2	2	0	2	2	7
OG2_2763	14	2	2	1	2	2	1	2	2	8
OG2_2764	14	2	2	2	1	2	2	1	2	8
OG2_2765	14	2	2	2	2	2	0	2	2	7
OG2_2766	14	1	2	2	1	3	2	1	2	8
OG2_2767	14	2	1	1	2	1	2	2	3	8
OG2_2768	14	2	2	1	2	2	1	2	2	8
OG2_2769	14	2	2	1	2	2	1	2	2	8
OG2_2770	14	2	2	1	2	1	2	2	2	8
OG2_2771	14	2	1	2	2	1	1	3	2	8
OG2_2772	14	2	2	1	5	1	1	1	1	8
OG2_2773	14	2	1	1	2	1	2	1	4	8
OG2_2774	14	1	2	2	1	2	2	2	2	8
OG2_2775	14	2	2	2	2	2	0	2	2	7
OG2_2776	14	3	1	1	3	1	2	1	2	8
OG2_2777	14	2	2	1	2	2	1	2	2	8
OG2_2778	14	3	4	0	2	1	1	0	3	6
OG2_2779	14	1	1	1	3	1	1	1	5	8
OG2_2780	14	2	2	2	2	1	2	1	2	8
OG2_2781	14	2	2	2	1	2	1	2	2	8
OG2_2782	14	2	2	1	2	2	1	2	2	8
OG2_2783	14	2	1	1	1	1	4	2	2	8
OG2_2784	14	1	2	2	2	2	1	2	2	8
OG2_2785	14	1	2	2	2	2	1	1	3	8
OG2_2786	14	2	2	1	2	2	1	2	2	8
OG2_2787	14	1	2	1	2	2	2	2	2	8
OG2_2788	14	2	1	1	2	2	2	1	3	8
OG2_2789	14	0	0	0	0	0	0	0	14	1
OG2_2790	14	2	2	2	1	1	2	2	2	8
OG2_2791	14	2	2	1	2	2	1	2	2	8
OG2_2792	14	2	2	1	2	2	2	1	2	8
OG2_2793	14	2	2	2	2	2	0	2	2	7
OG2_2794	14	2	2	2	1	2	0	2	3	7
OG2_2795	14	1	2	1	1	2	2	1	4	8
OG2_2796	14	0	0	0	0	0	0	0	14	1
OG2_2797	14	2	2	2	2	2	0	2	2	7
OG2_2798	14	2	2	2	2	2	0	2	2	7
OG2_2799	14	2	2	2	2	2	0	2	2	7
OG2_2800	14	2	2	2	2	1	1	2	2	8
OG2_2801	14	2	2	2	2	2	0	2	2	7
OG2_2802	14	2	1	1	2	1	3	3	1	8
OG2_2803	14	1	1	2	2	2	2	2	2	8
OG2_2804	14	2	2	2	2	2	1	2	1	8
OG2_2805	14	2	2	2	2	2	0	2	2	7
OG2_2806	14	2	2	2	1	2	2	2	1	8
OG2_2807	14	4	1	0	2	0	3	3	1	6
OG2_2808	14	2	2	1	2	1	2	2	2	8
OG2_2809	14	1	2	2	1	2	1	3	2	8
OG2_2810	14	3	1	1	2	1	3	2	1	8
OG2_2811	14	2	2	1	2	2	1	2	2	8
OG2_2812	14	2	2	1	2	2	1	2	2	8
OG2_2813	14	2	2	1	2	2	1	2	2	8
OG2_2814	14	2	2	2	2	2	0	2	2	7
OG2_2815	14	2	2	1	1	2	2	2	2	8
OG2_2816	14	2	2	2	2	2	0	2	2	7
OG2_2817	14	2	2	1	2	2	1	2	2	8
OG2_2818	14	2	2	1	2	2	1	2	2	8
OG2_2819	14	2	2	1	2	2	1	2	2	8
OG2_2820	14	2	2	1	1	2	3	2	1	8
OG2_2821	14	2	2	1	2	2	1	2	2	8
OG2_2822	14	2	2	1	2	2	1	2	2	8
OG2_2823	14	2	2	2	1	2	1	2	2	8
OG2_2824	14	2	2	1	2	2	1	2	2	8
OG2_2825	14	2	2	1	2	1	2	2	2	8
OG2_2826	14	2	2	1	2	2	1	2	2	8
OG2_2827	14	1	2	1	2	1	3	3	1	8
OG2_2828	14	2	2	2	1	2	1	2	2	8
OG2_2829	14	2	1	2	2	2	1	2	2	8
OG2_2830	14	2	1	2	2	1	2	2	2	8
OG2_2831	14	1	2	2	2	2	1	2	2	8
OG2_2832	14	2	1	1	2	1	3	2	2	8
OG2_2833	14	1	2	2	2	2	2	2	1	8
OG2_2834	14	2	2	2	2	2	2	1	1	8
OG2_2835	14	2	2	1	1	2	2	2	2	8
OG2_2836	14	2	1	1	1	2	4	1	2	8
OG2_2837	14	0	0	0	0	0	14	0	0	1
OG2_2838	14	0	0	0	0	0	0	14	0	1
OG2_2839	14	0	0	0	0	0	0	14	0	1
OG2_2840	14	2	2	2	2	2	2	1	1	8
OG2_2841	14	2	2	2	2	2	1	1	2	8
OG2_2842	14	2	2	1	2	2	2	1	2	8
OG2_2843	14	2	2	2	2	2	1	1	2	8
OG2_2844	14	1	2	2	2	2	2	1	2	8
OG2_2845	14	3	1	1	3	1	3	1	1	8
OG2_2846	14	2	2	2	2	2	1	1	2	8
OG2_2847	14	2	2	2	2	2	1	1	2	8
OG2_2848	14	2	2	3	1	3	1	1	1	8
OG2_2849	13	2	2	1	1	2	1	2	2	8
OG2_2850	13	1	2	2	2	2	2	1	1	8
OG2_2851	13	1	2	2	2	2	1	1	2	8
OG2_2852	13	2	2	1	2	2	0	2	2	7
OG2_2853	13	2	2	1	1	2	1	2	2	8
OG2_2854	13	1	2	1	3	3	1	1	1	8
OG2_2855	13	0	3	2	0	3	0	2	3	5
OG2_2856	13	2	2	1	2	2	0	2	2	7
OG2_2857	13	2	2	1	2	2	0	2	2	7
OG2_2858	13	1	2	2	1	2	1	2	2	8
OG2_2859	13	2	1	1	2	2	1	2	2	8
OG2_2860	13	2	2	1	1	2	1	2	2	8
OG2_2861	13	2	2	2	1	2	1	1	2	8
OG2_2862	13	2	1	2	2	2	1	1	2	8
OG2_2863	13	1	2	2	1	2	2	1	2	8
OG2_2864	13	2	2	1	1	2	1	2	2	8
OG2_2865	13	1	3	2	1	2	1	2	1	8
OG2_2866	13	1	3	1	0	4	1	3	0	6
OG2_2867	13	1	2	2	2	2	2	2	0	7
OG2_2868	13	2	2	1	2	2	0	2	2	7
OG2_2869	13	2	2	1	2	2	1	1	2	8
OG2_2870	13	2	2	1	2	2	1	1	2	8
OG2_2871	13	1	3	2	1	2	2	2	0	7
OG2_2872	13	1	2	2	1	2	3	1	1	8
OG2_2873	13	2	2	1	2	2	1	1	2	8
OG2_2874	13	2	2	1	2	2	0	2	2	7
OG2_2875	13	2	3	3	1	2	0	1	1	7
OG2_2876	13	2	1	2	1	2	2	2	1	8
OG2_2877	13	1	3	1	2	2	1	1	2	8
OG2_2878	13	2	1	1	2	2	1	2	2	8
OG2_2879	13	2	2	0	0	3	1	3	2	6
OG2_2880	13	0	2	1	1	2	4	2	1	7
OG2_2881	13	1	2	1	2	2	1	2	2	8
OG2_2882	13	1	1	0	2	2	1	3	3	7
OG2_2883	13	1	2	1	2	2	1	2	2	8
OG2_2884	13	4	1	1	2	2	1	1	1	8
OG2_2885	13	1	0	0	2	0	1	0	9	4
OG2_2886	13	1	2	1	2	1	3	2	1	8
OG2_2887	13	2	1	1	2	1	2	2	2	8
OG2_2888	13	3	2	1	3	1	1	0	2	7
OG2_2889	13	2	1	0	2	2	1	3	2	7
OG2_2890	13	2	2	2	2	1	1	1	2	8
OG2_2891	13	1	2	1	2	2	1	2	2	8
OG2_2892	13	1	2	1	2	2	3	0	2	7
OG2_2893	13	1	2	2	5	1	1	0	1	7
OG2_2894	13	2	1	2	2	1	1	2	2	8
OG2_2895	13	1	1	0	1	1	0	1	8	6
OG2_2896	13	2	1	1	1	1	1	2	4	8
OG2_2897	13	1	2	2	1	2	1	1	3	8
OG2_2898	13	1	0	1	1	1	4	1	4	7
OG2_2899	13	1	1	1	1	1	1	1	6	8
OG2_2900	13	1	2	2	1	2	2	1	2	8
OG2_2901	13	1	1	2	2	2	2	1	2	8
OG2_2902	13	2	2	2	0	1	1	3	2	7
OG2_2903	13	0	0	0	0	0	0	0	13	1
OG2_2904	13	1	0	0	0	0	1	9	2	4
OG2_2905	13	2	1	1	2	1	2	2	2	8
OG2_2906	13	2	2	0	1	1	2	2	3	7
OG2_2907	13	1	2	2	1	2	1	1	3	8
OG2_2908	13	3	1	1	1	1	1	4	1	8
OG2_2909	13	2	1	1	2	1	2	2	2	8
OG2_2910	13	1	2	2	2	1	1	2	2	8
OG2_2911	13	1	1	3	1	1	3	2	1	8
OG2_2912	13	2	2	1	1	2	1	2	2	8
OG2_2913	13	2	2	0	2	2	1	2	2	7
OG2_2914	13	2	2	2	1	2	1	2	1	8
OG2_2915	13	2	1	1	1	2	2	3	1	8
OG2_2916	13	1	2	1	2	2	1	2	2	8
OG2_2917	13	2	1	2	2	1	1	2	2	8
OG2_2918	13	0	0	0	1	0	0	12	0	2
OG2_2919	13	0	2	2	2	2	2	1	2	7
OG2_2920	13	1	2	2	2	2	1	1	2	8
OG2_2921	13	2	1	1	2	2	1	2	2	8
OG2_2922	13	2	2	1	2	2	0	2	2	7
OG2_2923	13	2	2	1	2	2	1	2	1	8
OG2_2924	13	2	2	2	1	2	1	2	1	8
OG2_2925	13	2	1	1	2	2	2	2	1	8
OG2_2926	13	2	1	1	2	1	2	2	2	8
OG2_2927	13	1	2	1	2	2	1	2	2	8
OG2_2928	13	2	1	1	2	2	1	2	2	8
OG2_2929	13	1	1	2	2	1	1	3	2	8
OG2_2930	13	1	2	1	1	2	2	3	1	8
OG2_2931	13	1	2	1	2	1	3	1	2	8
OG2_2932	13	0	2	1	1	3	4	1	1	7
OG2_2933	13	2	1	1	2	1	5	1	0	7
OG2_2934	13	2	2	2	1	2	0	2	2	7
OG2_2935	13	0	0	0	0	0	0	13	0	1
OG2_2936	13	2	2	2	1	2	1	1	2	8
OG2_2937	13	2	2	2	1	2	1	1	2	8
OG2_2938	13	1	2	2	1	2	2	1	2	8
OG2_2939	13	3	1	1	3	1	3	1	0	7
OG2_2940	13	2	2	2	1	2	1	1	2	8
OG2_2941	13	2	2	1	2	2	1	1	2	8
OG2_2942	13	2	2	2	0	2	2	1	2	7
OG2_2943	13	2	2	2	1	2	1	1	2	8
OG2_2944	13	1	2	1	2	2	2	1	2	8
OG2_2945	13	2	2	1	2	2	1	1	2	8
OG2_2946	13	2	2	2	1	2	2	1	1	8
OG2_2947	13	1	2	2	2	2	1	1	2	8
OG2_2948	13	2	1	2	2	2	2	1	1	8
OG2_2949	13	2	2	2	2	1	1	1	2	8
OG2_2950	13	2	2	2	1	2	2	1	1	8
OG2_2951	12	2	2	2	1	2	0	2	1	7
OG2_2952	12	2	1	1	2	2	1	1	2	8
OG2_2953	12	2	2	2	2	2	1	1	0	7
OG2_2954	12	2	2	0	2	2	0	2	2	6
OG2_2955	12	1	1	2	1	2	3	1	1	8
OG2_2956	12	1	2	1	1	3	1	2	1	8
OG2_2957	12	1	2	3	1	2	1	1	1	8
OG2_2958	12	2	2	2	1	2	1	2	0	7
OG2_2959	12	1	1	2	2	2	2	2	0	7
OG2_2960	12	2	2	1	2	2	1	1	1	8
OG2_2961	12	1	2	1	1	2	2	1	2	8
OG2_2962	12	1	2	1	2	2	1	1	2	8
OG2_2963	12	3	2	0	2	2	1	0	2	6
OG2_2964	12	2	2	1	1	2	1	1	2	8
OG2_2965	12	4	0	0	2	2	3	1	0	5
OG2_2966	12	1	2	2	2	2	1	1	1	8
OG2_2967	12	2	2	1	2	2	2	1	0	7
OG2_2968	12	2	1	1	2	2	1	1	2	8
OG2_2969	12	1	1	1	3	2	1	2	1	8
OG2_2970	12	2	1	1	2	2	1	1	2	8
OG2_2971	12	1	3	2	1	2	1	0	2	7
OG2_2972	12	2	2	2	2	2	0	1	1	7
OG2_2973	12	2	2	1	1	2	2	1	1	8
OG2_2974	12	2	2	1	3	1	2	0	1	7
OG2_2975	12	2	1	1	2	1	1	2	2	8
OG2_2976	12	1	1	1	4	1	1	2	1	8
OG2_2977	12	3	0	0	3	2	2	1	1	6
OG2_2978	12	1	1	1	4	1	2	1	1	8
OG2_2979	12	1	1	1	2	1	2	2	2	8
OG2_2980	12	2	1	1	2	1	1	2	2	8
OG2_2981	12	1	1	1	2	1	3	2	1	8
OG2_2982	12	1	2	2	2	1	2	1	1	8
OG2_2983	12	1	1	1	3	0	4	0	2	6
OG2_2984	12	2	1	1	1	2	2	2	1	8
OG2_2985	12	1	1	1	4	1	1	0	3	7
OG2_2986	12	0	1	3	3	2	1	0	2	6
OG2_2987	12	1	1	1	3	1	1	1	3	8
OG2_2988	12	3	0	1	5	1	0	0	2	5
OG2_2989	12	0	0	0	2	0	1	9	0	3
OG2_2990	12	1	2	2	1	2	0	2	2	7
OG2_2991	12	2	2	1	1	2	0	1	3	7
OG2_2992	12	2	2	0	1	1	2	2	2	7
OG2_2993	12	2	1	1	1	1	1	1	4	8
OG2_2994	12	1	1	1	1	1	2	1	4	8
OG2_2995	12	1	0	0	1	0	1	1	8	5
OG2_2996	12	1	1	1	1	1	1	1	5	8
OG2_2997	12	1	0	1	1	1	1	1	6	7
OG2_2998	12	1	0	1	0	0	0	0	10	3
[truncated: 14,697 more rows]
